# Supplementary material for: Selenotranscriptome Network in Non-alcoholic Fatty Liver Disease
Source: Front Nutr. 2021 Nov 17;8:744825. doi: 10.3389/fnut.2021.744825 (PMC8635790; doi:10.3389/fnut.2021.744825)
Supplement: Supplementary file 1 [file Table_1.xlsx]

## Sheet: Suppl Table 1. HC vs steatosis
Supplementary Table 1. Differential gene expression of genes included in the analysis in steatosis compared to Normal Weight Healthy Controls (HC) (Frades et al. [24], Suppli et al. [28], Lake et al. [29], Horvath et al. [30]). Significant adjusted P-values in bold
ENSG_ID	Gene name	Full gene name	Frades_adj.p_value	Frades_p_value	Frades_logFC	Horvath_adj.p_value	Horvath_p_value	Horvath_logFC	Lake_adj.p_value	Lake_p_value	Lake_logFC	Suppli_adj.p_value	Suppli_p_value	Suppli_logFC
Selenoproteins
ENSG00000197763	TXNRD3	thioredoxin reductase 3	0.972987	0.866406	-0.0317616	0.303787	0.075009	-0.118558	0.940006	0.873792	0.010913	0.000274858	5.81e-05	-0.508173
ENSG00000113811	SELENOK	selenoprotein K	0.850895	0.315146	-0.155633	0.51796	0.214218	-0.152005	0.904325	0.642982	0.0769982	0.00012495	2.48e-05	0.355474
ENSG00000184470	TXNRD2	thioredoxin reductase 2	0.906012	0.479506	0.221093	0.916713	0.823592	-0.0186474	0.81429	0.431343	-0.0576618	0.154771	0.0877891	-0.214946
ENSG00000179918	SEPHS2	selenophosphate synthetase 2	0.95491	0.691585	-0.0867173	0.810152	0.515624	-0.0560929	0.913702	0.733865	-0.0196573	5.88e-07	7.54e-08	0.398757
ENSG00000186838	SELENOV	selenoprotein V	#N/A	#N/A	#N/A	0.796572	0.494193	-0.045175	0.44799	0.052542	-0.140541	NA	NA	NA
ENSG00000211450	SELENOH	selenoprotein H	0.95491	0.701535	0.0504892	0.439688	0.149383	-0.11668	0.590736	0.105749	-0.102771	0.448053	0.312654	-0.380428
ENSG00000250722	SELENOP	selenoprotein P	0.906012	0.450367	-0.254695	0.40377	0.118297	-0.0978599	0.82339	0.457439	-0.132548	0.642086	0.518608	0.0781549
ENSG00000183291	SELENOF	selenoprotein F	0.95491	0.67949	-0.159631	0.464831	0.177898	-0.0773482	0.927293	0.827905	0.027802	0.00451481	0.00141811	0.243398
ENSG00000138018	SELENOI	selenoprotein I	0.972987	0.895697	0.0462415	0.796572	0.481022	-0.0727566	0.725788	0.273291	0.135328	0.448053	0.318807	0.14698
ENSG00000198736	MSRB1	methionine sulfoxide reductase B1	0.976251	0.909962	-0.0236598	0.796572	0.486621	-0.0527595	0.878064	0.562291	-0.0514792	0.551323	0.431163	0.0998581
ENSG00000198843	SELENOT	selenoprotein T	0.906012	0.428946	-0.189556	0.987471	0.987471	0.00140924	0.83194	0.487788	0.0789917	0.000420274	9.97e-05	0.274737
ENSG00000131871	SELENOS	selenoprotein S	0.906012	0.494336	-0.0967445	0.108966	0.0114347	-0.288651	0.875303	0.551116	-0.0762124	3.19e-13	1.64e-14	0.714309
ENSG00000197406	DIO3	deiodinase, iodothyronine type III	0.906012	0.493388	-0.140669	0.295522	0.0711442	-0.148477	0.775589	0.377548	-0.076934	1.76e-06	2.6e-07	-3.09712
ENSG00000211448	DIO2	deiodinase, iodothyronine type II	0.972987	0.841752	-0.0256052	0.586381	0.249755	0.0767939	0.0797402	0.000984446	-0.268708	0.448053	0.318457	-1.11557
ENSG00000211452	DIO1	deiodinase, iodothyronine type I	0.91548	0.564715	0.205415	0.83199	0.574485	-0.0719482	0.997399	0.997399	0.000888529	9.12e-06	1.52e-06	0.636278
ENSG00000198704	GPX6	glutathione peroxidase 6	#N/A	#N/A	#N/A	0.916713	0.848808	0.0129521	0.646682	0.222798	-0.0957469	NA	NA	NA
ENSG00000211445	GPX3	glutathione peroxidase 3	0.91548	0.587715	-0.203619	0.916713	0.785182	0.029578	0.933168	0.858284	0.0243963	0.0512146	0.0242941	0.303254
ENSG00000178980	SELENOW	selenoprotein W	0.972987	0.853799	0.073199	0.586381	0.248591	0.127033	0.878064	0.563695	0.0508044	1.82e-11	1.17e-12	0.951063
ENSG00000167468	GPX4	glutathione peroxidase 4	0.906012	0.410568	0.188454	0.68846	0.365479	0.0666124	0.83194	0.482831	-0.0762935	0.655849	0.533991	-0.0913739
ENSG00000073169	SELENOO	selenoprotein O	0.7957	0.181504	0.902732	0.271953	0.060434	0.160022	0.646682	0.175987	-0.133018	0.000655492	0.000163873	-0.796252
ENSG00000233276	GPX1	glutathione peroxidase 1	0.792406	0.151633	0.850588	0.439688	0.162847	0.115565	0.614371	0.124941	0.135831	0.0014632	0.000412697	-0.700043
ENSG00000198431	TXNRD1	thioredoxin reductase 1	0.945197	0.618462	0.171638	0.0847196	0.00721787	-0.251506	0.408558	0.0419359	0.35626	0.479076	0.355332	0.106204
ENSG00000198832	SELENOM	selenoprotein M	0.906012	0.494071	0.277955	0.83199	0.647104	-0.0423556	0.272311	0.0117665	-0.200901	0.186646	0.114859	-0.33903
ENSG00000162430	SELENON	selenoprotein N	0.904027	0.351566	0.223841	0.205904	0.0376576	0.165944	0.90404	0.621756	-0.0339659	0.000103367	1.92e-05	-0.659404
ENSG00000176153	GPX2	glutathione peroxidase 2	0.983769	0.954538	-0.0899884	0.949913	0.920595	-0.0280939	0.75486	0.326174	0.21973	0.00832615	0.00314899	1.33026
Other genes involved in included pathways
ENSG00000140465	CYP1A1	cytochrome P450 family 1 subfamily A member 1	0.95491	0.709619	0.288073	0.0216326	0.000400604	-1.21799	0.646682	0.177438	-0.620134	0.175834	0.104824	-0.683982
ENSG00000134184	GSTM1	glutathione S-transferase mu 1	0.906012	0.497223	-0.638978	0.857143	0.677856	0.250015	0.89282	0.57868	-0.363295	0.533229	0.410176	-1.01515
ENSG00000277656	GSTT1	glutathione S-transferase theta 1	0.317607	0.0235264	-1.75459	0.116437	0.0150937	-1.43447	0.913702	0.746924	-0.143782	#N/A	#N/A	#N/A
ENSG00000099984	GSTT2	glutathione S-transferase theta 2 (gene/pseudogene)	0.906012	0.417141	-0.45586	0.916713	0.828821	0.0722939	0.968444	0.932375	-0.0148827	#N/A	#N/A	#N/A
ENSG00000189221	MAOA	monoamine oxidase A	0.95491	0.692565	-0.0859723	0.916713	0.817874	-0.0180455	0.90404	0.627296	0.062155	0.0149602	0.00613751	-0.33078
ENSG00000116761	CTH	cystathionine gamma-lyase	0.7957	0.181807	-0.803571	0.83199	0.573657	-0.0875857	0.91256	0.686	-0.092585	0.886011	0.863256	-0.0249012
ENSG00000160200	CBS	cystathionine-beta-synthase	0.964493	0.779929	-0.0831645	0.469648	0.18554	-0.102136	0.646682	0.232764	-0.202373	0.00621064	0.00222946	-1.34158
ENSG00000117009	KMO	kynurenine 3-monooxygenase	0.906012	0.43216	-0.248945	0.789618	0.453299	0.0819382	0.860623	0.525936	0.126168	0.655849	0.538132	-0.0920249
ENSG00000141504	SAT2	spermidine/spermine N1-acetyltransferase family member 2	0.829787	0.271687	-0.28799	0.916713	0.824331	-0.0235785	0.775589	0.34643	-0.112634	0.256641	0.164514	0.223618
ENSG00000109618	SEPSECS	Sep (O-phosphoserine) tRNA:Sec (selenocysteine) tRNA synthase	0.153952	0.0047516	-0.899336	0.857143	0.692186	-0.0243021	0.0100926	6.22999e-05	0.418184	0.948254	0.942176	-0.0089923
ENSG00000132330	SCLY	selenocysteine lyase	0.829787	0.255313	-0.208247	0.640366	0.320183	-0.112433	0.857438	0.518697	0.054595	0.728799	0.643913	0.140412
ENSG00000115919	KYNU	kynureninase	0.95491	0.730918	0.0751691	0.902561	0.743359	0.0255593	0.732389	0.298381	0.159591	0.154771	0.0892911	-0.197207
ENSG00000142168	SOD1	superoxide dismutase 1, soluble	0.725583	0.129888	-0.296995	0.0954313	0.00883623	-0.197799	0.775589	0.384548	-0.121494	0.746413	0.674643	-0.0239064
ENSG00000180210	F2	coagulation factor II, thrombin	0.945774	0.631907	0.0952488	0.673641	0.353453	0.0833286	0.83194	0.482453	0.0776	0.420544	0.28845	0.120158
ENSG00000138821	SLC39A8	solute carrier family 39 member 8	0.518515	0.0569352	-0.608181	0.926759	0.878631	-0.0121309	0.904325	0.647541	0.053504	0.0155018	0.00645909	0.241913
ENSG00000165029	ABCA1	ATP binding cassette subfamily A member 1	0.95491	0.655252	0.101263	0.205904	0.0394014	-0.156717	0.794166	0.41179	0.121596	1.6e-11	9.2e-13	-1.40138
ENSG00000273259	SERPINA3	serpin family A member 3	0.972987	0.882402	-0.0362989	0.0695518	0.00343466	-0.164452	0.732389	0.295603	0.0928089	0.0104194	0.00411049	0.557509
ENSG00000187193	MT1X	metallothionein 1X	0.780326	0.144505	0.571867	0.83199	0.633546	-0.0508619	0.913702	0.695209	0.100572	1.05e-09	8.78e-11	-1.54496
ENSG00000122194	PLG	plasminogen	0.95491	0.722373	-0.0940155	0.439688	0.146148	-0.0892993	0.969991	0.952314	-0.00730779	3.11e-10	2.39e-11	-0.869434
ENSG00000110911	SLC11A2	solute carrier family 11 member 2	0.543311	0.0637216	-0.42607	0.462709	0.17423	-0.092222	0.732389	0.295841	0.111761	0.114183	0.0578233	-0.257292
ENSG00000116044	NFE2L2	nuclear factor, erythroid 2 like 2	0.909415	0.525558	0.256544	0.953961	0.930407	-0.00963162	0.775589	0.354056	0.159432	0.00889798	0.0034223	-0.260304
ENSG00000177000	MTHFR	methylenetetrahydrofolate reductase	0.972987	0.895943	-0.0150816	0.600377	0.281659	-0.0900531	0.913702	0.728766	-0.0448639	0.00739513	0.00274947	-0.361432
ENSG00000197142	ACSL5	acyl-CoA synthetase long-chain family member 5	0.95491	0.660676	-0.185116	0.83199	0.599808	0.0456594	0.927293	0.832399	-0.0535189	0.676084	0.576405	-0.0827721
ENSG00000213366	GSTM2	glutathione S-transferase mu 2	0.906012	0.497223	-0.638978	0.148786	0.0229608	0.470662	0.732389	0.284333	-0.196351	0.779958	0.714962	-0.152177
ENSG00000047457	CP	ceruloplasmin	0.606063	0.0827969	-0.425221	0.590724	0.262544	-0.0513744	0.569567	0.0984437	0.163419	0.0183139	0.00786559	-0.483042
ENSG00000148965	SAA4	serum amyloid A4, constitutive	0.95491	0.686284	0.142616	0.610807	0.290322	-0.0867237	0.775589	0.383685	0.137614	0.107174	0.0535872	0.594535
ENSG00000104635	SLC39A14	solute carrier family 39 member 14	0.906012	0.388628	-0.527175	0.626178	0.305358	-0.0813467	0.913702	0.704067	0.0555802	0.675692	0.571739	0.0706785
ENSG00000057593	F7	coagulation factor VII	0.7957	0.19872	0.415052	0.926759	0.884004	0.015435	0.775589	0.355953	-0.127336	6.03e-06	9.28e-07	-0.655032
ENSG00000173432	SAA1	serum amyloid A1	0.972987	0.855088	0.200432	0.83199	0.620145	-0.218497	0.91256	0.678374	0.0732053	0.000105199	2.02e-05	1.85534
ENSG00000006625	GGCT	gamma-glutamylcyclotransferase	0.518515	0.0576127	-0.39647	0.796572	0.492044	-0.066037	0.646682	0.239512	-0.121631	2.44e-15	7.09e-17	1.10905
ENSG00000151726	ACSL1	acyl-CoA synthetase long-chain family member 1	0.95491	0.696489	0.126912	0.83199	0.583941	0.0297157	0.646682	0.239212	-0.162622	0.452424	0.324817	-0.122631
ENSG00000138449	SLC40A1	solute carrier family 40 member 1	0.906012	0.367532	-0.235287	0.810152	0.52175	-0.0540213	0.875303	0.545899	0.109719	0.00518403	0.00172801	-0.37707
ENSG00000123131	PRDX4	peroxiredoxin 4	0.906012	0.476587	-0.229302	0.11185	0.0138086	-0.227726	0.913702	0.749097	0.0414279	8.74e-07	1.18e-07	0.584527
ENSG00000182793	GSTA5	glutathione S-transferase alpha 5	#N/A	#N/A	#N/A	0.238395	0.0491525	-0.13452	0.632788	0.154726	-0.199331	0.128714	0.0679626	1.53415
ENSG00000132693	CRP	C-reactive protein	0.909415	0.513189	0.638928	0.439688	0.157744	0.544441	0.83194	0.476017	0.137786	0.000301715	6.58e-05	2.26346
ENSG00000100348	TXN2	thioredoxin 2	0.983769	0.938303	-0.0175761	0.0971106	0.00959117	-0.222319	0.940006	0.876179	-0.0160777	0.898534	0.881255	0.014527
ENSG00000171105	INSR	insulin receptor	0.906012	0.405049	-0.123981	0.191936	0.0331741	-0.145802	0.632788	0.156244	0.165562	0.117079	0.0600403	-0.394516
ENSG00000117862	TXNDC12	thioredoxin domain containing 12	0.829787	0.256319	-0.206395	0.916713	0.799421	0.026643	0.516365	0.0768918	0.202756	8.05e-06	1.29e-06	0.359234
ENSG00000112062	MAPK14	mitogen-activated protein kinase 14	0.964493	0.771359	0.0617186	0.40377	0.120458	0.102145	0.304494	0.0150367	0.194881	0.0816936	0.0392758	0.174024
ENSG00000138413	IDH1	isocitrate dehydrogenase (NADP+)) 1, cytosolic	0.7957	0.209337	-0.339012	0.916713	0.835319	0.0156271	0.962154	0.902762	-0.0229813	0.256495	0.162775	0.131115
ENSG00000156482	RPL30	ribosomal protein L30	0.909415	0.523138	-0.119207	0.0256637	0.000633672	-0.162588	0.327661	0.0218277	0.227627	0.723801	0.631006	0.0355688
ENSG00000197111	PCBP2	poly(rC) binding protein 2	0.7957	0.215008	0.292326	0.840018	0.658532	-0.0236729	0.496705	0.0613216	0.159013	0.176163	0.107279	0.194573
ENSG00000111684	LPCAT3	lysophosphatidylcholine acyltransferase 3	0.638565	0.106428	0.489947	0.78965	0.46216	0.0801425	0.913702	0.750228	0.0471221	0.782077	0.726931	0.0410559
ENSG00000115107	STEAP3	STEAP3 metalloreductase	0.829787	0.25933	-0.402161	0.439688	0.157617	-0.0921873	0.81429	0.44233	-0.0679306	0.663573	0.548724	0.0855977
ENSG00000001084	GCLC	glutamate-cysteine ligase catalytic subunit	0.967809	0.794108	0.0498767	0.765544	0.434753	-0.0568615	0.516365	0.0828734	0.167856	0.479076	0.356777	0.0918213
ENSG00000243955	GSTA1	glutathione S-transferase alpha 1	0.829787	0.284437	0.616679	0.977674	0.971639	0.003442	0.90404	0.612328	-0.336944	0.0309296	0.0138786	0.290849
ENSG00000074771	NOX3	NADPH oxidase 3	0.945774	0.640037	-0.0546061	0.926759	0.884747	-0.00828598	0.497437	0.0705959	-0.125182	NA	NA	NA
ENSG00000197769	MAP1LC3C	microtubule associated protein 1 light chain 3 gamma	0.866916	0.326431	-0.152479	0.857143	0.693122	-0.0309677	0.646682	0.220835	-0.0793724	0.128942	0.0698474	-1.93638
ENSG00000158125	XDH	xanthine dehydrogenase	0.634542	0.10184	-0.463612	0.374061	0.103906	0.126658	0.81429	0.437464	-0.165323	0.697133	0.603288	-0.0830318
ENSG00000185591	SP1	Sp1 transcription factor	0.7957	0.185162	0.250064	0.83199	0.643535	-0.0293288	0.327661	0.0237167	0.193085	2.44e-15	7.8e-17	-0.7684
ENSG00000057663	ATG5	autophagy related 5	0.158872	0.00588416	-0.684024	0.83199	0.59718	-0.0293032	0.632788	0.147202	0.170297	5.18e-08	5.64e-09	0.501819
ENSG00000072274	TFRC	transferrin receptor	0.606063	0.0882565	-0.643858	0.511537	0.208404	-0.230865	0.968444	0.926064	0.0304922	0.733732	0.653774	-0.167601
ENSG00000171867	PRNP	prion protein	0.964493	0.772738	-0.109783	0.916713	0.811115	-0.0238061	0.924924	0.809369	0.0255079	0.494886	0.377509	-0.11343
ENSG00000134339	SAA2	serum amyloid A2	0.972987	0.895481	0.153341	0.83199	0.584602	-0.240784	0.914185	0.778256	0.0508361	2.26e-09	2.17e-10	2.37157
ENSG00000116984	MTR	5-methyltetrahydrofolate-homocysteine methyltransferase	0.964493	0.768112	-0.0695154	0.0457829	0.00169566	0.244046	0.349846	0.0302336	0.202827	5.8e-15	2.23e-16	-1.14424
ENSG00000165637	VDAC2	voltage dependent anion channel 2	0.972987	0.900914	0.0195585	0.83199	0.632955	-0.0387337	0.614371	0.115899	0.284327	0.148171	0.0826337	-0.144077
ENSG00000166825	ANPEP	alanyl aminopeptidase, membrane	0.964493	0.754147	0.101635	0.83199	0.623056	0.0317785	0.863971	0.533315	-0.0718397	2.76e-07	3.36e-08	-0.569809
ENSG00000008394	MGST1	microsomal glutathione S-transferase 1	0.829787	0.279249	-0.241787	0.83199	0.613586	-0.0323478	0.969991	0.958016	0.00689568	0.593422	0.471694	0.0723703
ENSG00000108439	PNPO	pyridoxamine 5'-phosphate oxidase	0.983769	0.923685	-0.0196512	0.83199	0.61284	0.0465525	0.924924	0.806002	-0.0320211	8.38e-05	1.5e-05	-0.622156
ENSG00000163586	FABP1	fatty acid binding protein 1	0.7957	0.203299	-0.286493	0.511537	0.208132	-0.107135	0.24784	0.00917926	-0.687473	5.33e-23	3.42e-25	1.55761
ENSG00000023909	GCLM	glutamate-cysteine ligase modifier subunit	0.7957	0.207321	0.740574	0.0847196	0.00668439	-0.299811	0.24784	0.00472633	0.576435	0.176163	0.106595	-0.243654
ENSG00000136244	IL6	interleukin 6	0.95491	0.728254	0.288251	0.669388	0.34349	-0.24534	0.90404	0.636176	0.0844393	0.672789	0.560657	1.01463
ENSG00000178814	OPLAH	5-oxoprolinase (ATP-hydrolysing)	0.829787	0.28684	0.471916	0.765544	0.434094	0.0728502	0.628217	0.135726	-0.130742	0.00518455	0.00176142	-0.728243
ENSG00000104835	SARS2	seryl-tRNA synthetase 2, mitochondrial	0.992658	0.992658	-0.00323642	0.599281	0.273746	-0.0914208	0.969991	0.952812	0.00439107	0.128942	0.070257	0.475204
ENSG00000167996	FTH1	ferritin heavy chain 1	0.906012	0.437766	0.152196	0.191936	0.0328098	-0.0976871	0.327661	0.0242712	0.221161	0.0183864	0.00801457	0.300343
ENSG00000255346	NOX5	NADPH oxidase 5	0.983769	0.970728	-0.0047301	0.703472	0.382133	0.0559225	0.928001	0.847803	0.0113512	0.798637	0.757682	-0.393732
ENSG00000117450	PRDX1	peroxiredoxin 1	0.239435	0.0162579	-0.429279	0.628182	0.310213	-0.0763749	0.630252	0.140056	0.138611	0.000751383	0.000192662	0.353988
ENSG00000091513	TF	transferrin	0.91548	0.557158	-0.167677	0.916713	0.787813	-0.00989618	0.75486	0.323977	0.116667	0.321333	0.212162	-0.164973
ENSG00000165672	PRDX3	peroxiredoxin 3	0.91548	0.573969	-0.108839	0.83199	0.646256	0.0258505	0.927293	0.841432	-0.0219497	0.0399598	0.018443	0.259127
ENSG00000130066	SAT1	spermidine/spermine N1-acetyltransferase 1	0.964493	0.77841	0.100333	0.91988	0.857419	0.0115654	0.81429	0.43725	-0.138304	0.746413	0.673915	0.0543299
ENSG00000109320	NFKB1	nuclear factor kappa B subunit 1	0.34207	0.0274501	0.491677	0.916713	0.786551	-0.0205535	0.24784	0.00799051	0.319711	0.0162875	0.00689085	-0.251485
ENSG00000148834	GSTO1	glutathione S-transferase omega 1	0.870235	0.333053	-0.244934	0.00153227	9.45847e-06	-0.478539	0.775589	0.356724	0.124104	0.000396653	9.15e-05	0.412142
ENSG00000163631	ALB	albumin	0.829787	0.243558	-0.258015	0.916713	0.841866	-0.00531289	0.646682	0.234581	0.0650558	0.782077	0.725231	-0.051114
ENSG00000143416	SELENBP1	selenium binding protein 1	0.945774	0.642192	0.189581	0.616501	0.296834	0.130339	0.927293	0.841397	-0.0543706	0.321613	0.214409	0.129826
ENSG00000180098	TRNAU1AP	tRNA selenocysteine 1 associated protein 1	0.7957	0.206622	-0.170627	0.703472	0.380199	0.0474514	0.790341	0.404928	-0.0585766	0.0407071	0.0190488	0.286836
ENSG00000172845	SP3	Sp3 transcription factor	0.850895	0.308237	0.172029	0.153786	0.0246817	-0.14848	0.646682	0.233398	0.0854394	0.00149367	0.000430866	-0.480483
ENSG00000121691	CAT	catalase	0.906012	0.50334	0.1872	0.230248	0.045481	0.12528	0.628217	0.133096	-0.353965	0.147945	0.0815592	-0.162462
ENSG00000007952	NOX1	NADPH oxidase 1	0.91548	0.561682	0.0723092	0.916713	0.830478	-0.0116162	0.91256	0.667869	-0.0320731	NA	NA	NA
ENSG00000104368	PLAT	plasminogen activator, tissue type	0.972987	0.852446	0.0927907	0.439549	0.14109	0.201759	0.646682	0.207722	-0.127262	0.675692	0.571717	-0.151085
ENSG00000151012	SLC7A11	solute carrier family 7 member 11	0.967809	0.794559	0.0281274	0.83199	0.596528	-0.0557176	0.83194	0.491188	0.201516	0.798637	0.754498	0.276864
ENSG00000084674	APOB	apolipoprotein B	0.717429	0.124	-1.0037	0.78965	0.463066	-0.0195645	0.327661	0.0207414	0.153213	0.00150762	0.000444555	-0.59036
ENSG00000140941	MAP1LC3B	microtubule associated protein 1 light chain 3 beta	0.7957	0.221028	0.405718	0.439688	0.149962	-0.142629	0.646682	0.199878	0.215599	0.272395	0.178104	0.0989739
ENSG00000135002	RFK	riboflavin kinase	0.939301	0.608807	-0.100009	0.976348	0.964294	-0.00457031	0.914185	0.765919	0.0170296	0.000379879	8.52e-05	0.551999
ENSG00000181019	NQO1	NAD(P)H quinone dehydrogenase 1	0.91548	0.570935	-0.0957955	0.286369	0.0654052	-0.220659	0.646682	0.16778	0.203057	0.676834	0.581383	0.188068
ENSG00000123983	ACSL3	acyl-CoA synthetase long-chain family member 3	0.906012	0.489153	0.165839	0.079445	0.00539441	-0.205565	0.646682	0.198804	0.194125	0.343846	0.232318	0.116413
ENSG00000111537	IFNG	interferon gamma	0.906012	0.426788	0.101035	0.810152	0.521915	-0.0587887	0.914199	0.784405	0.0191414	0.631188	0.50576	0.462816
ENSG00000078668	VDAC3	voltage dependent anion channel 3	0.203813	0.0113229	-0.486481	0.590724	0.257233	-0.0583933	0.981133	0.975077	-0.00420963	0.000856969	0.000225229	0.363264
ENSG00000160688	FLAD1	flavin adenine dinucleotide synthetase 1	0.945774	0.625782	-0.0852891	0.916713	0.823665	-0.0123565	0.646682	0.190299	-0.0688797	0.000876332	0.000235936	0.389637
ENSG00000118137	APOA1	apolipoprotein A1	0.960333	0.740998	-0.0541049	0.810152	0.525099	0.0387305	0.408558	0.0428733	0.304723	0.175352	0.103413	0.296234
ENSG00000168003	SLC3A2	solute carrier family 3 member 2	0.227406	0.0140374	0.546754	0.429236	0.13513	-0.15556	0.646682	0.226404	0.197573	0.0841028	0.0409732	-0.261225
ENSG00000065621	GSTO2	glutathione S-transferase omega 2	0.906012	0.481979	0.151127	0.0457829	0.00141747	-0.304948	0.968444	0.92181	-0.0108968	0.189988	0.118134	0.433753
ENSG00000169564	PCBP1	poly(rC) binding protein 1	0.829787	0.262383	0.375952	0.374061	0.100178	-0.0944222	0.646682	0.186483	0.0936941	0.035602	0.0162035	-0.219015
ENSG00000167815	PRDX2	peroxiredoxin 2	0.95491	0.71039	-0.0505588	0.857143	0.689538	-0.0313202	0.91256	0.687236	0.0401757	0.0120404	0.00486248	-0.295732
ENSG00000126432	PRDX5	peroxiredoxin 5	0.829787	0.254275	0.534221	0.380186	0.107954	-0.152707	0.913702	0.732586	0.0217113	0.000495198	0.000120625	0.481489
ENSG00000166787	SAA3P	serum amyloid A3 pseudogene	0.906012	0.39278	-0.176949	0.976348	0.96257	-0.00399559	0.913702	0.732815	0.0444188	#N/A	#N/A	#N/A
ENSG00000181867	FTMT	ferritin mitochondrial	#N/A	#N/A	#N/A	0.796572	0.496628	0.0587251	0.90404	0.617938	-0.0448448	NA	NA	NA
ENSG00000008441	NFIX	nuclear factor I X	0.972987	0.846787	0.0297029	0.83199	0.589012	0.0613917	0.775589	0.390066	-0.0602893	2.78e-11	1.96e-12	-0.884317
ENSG00000087086	FTL	ferritin light chain	0.989996	0.983885	-0.00324847	0.926759	0.886714	-0.00676151	0.821708	0.451432	0.100067	0.00547469	0.00189508	0.337386
ENSG00000073060	SCARB1	scavenger receptor class B member 1	0.972987	0.844043	0.0795007	0.590724	0.262129	0.0711642	0.91256	0.680694	0.0462457	0.175352	0.10271	0.209672
ENSG00000100292	HMOX1	heme oxygenase 1	0.153952	0.00254144	1.9076	0.290657	0.0681788	0.387972	0.74146	0.306653	0.16339	1.2e-15	2.31e-17	-1.46048
ENSG00000281938	ACLS6	acyl-CoA synthetase long-chain family member 6	0.9395	0.651256	-0.0386747	0.130972	0.0185948	-0.171774	0.614371	0.12515	-0.10075	0.0204581	0.00904879	0.566682
ENSG00000104687	GSR	glutathione-disulfide reductase	0.91548	0.562669	-0.201265	0.27106	0.0585624	-0.108571	0.412605	0.045845	0.210366	0.814611	0.778058	-0.0328052
ENSG00000141510	TP53	tumor protein p53	0.91548	0.569224	0.107687	0.796572	0.475854	-0.0654217	0.569567	0.0964728	0.202489	8.92e-07	1.26e-07	-0.522483
ENSG00000100983	GSS	glutathione synthetase	0.91548	0.585202	-0.0953413	0.916713	0.835097	-0.0129266	0.913702	0.753563	0.0309135	0.00672252	0.00245631	0.272078
ENSG00000197548	ATG7	autophagy related 7	0.906012	0.3997	0.155746	0.469648	0.185333	0.0740566	0.497437	0.0706237	0.186856	0.448053	0.3179	0.0975138
ENSG00000232810	TNF	tumor necrosis factor	0.518515	0.054837	0.354278	0.83199	0.635053	-0.0550778	0.646682	0.187667	-0.118976	0.222297	0.139648	0.605035
ENSG00000132394	EEFSEC	eukaryotic elongation factor, selenocysteine-tRNA specific	0.606063	0.0935282	0.470206	0.83199	0.569446	-0.0418732	0.913702	0.755778	0.0210064	0.480665	0.36358	-0.115862
ENSG00000173039	RELA	RELA proto-oncogene, NF-kB subunit	0.203813	0.0105034	0.791848	0.938917	0.904142	0.0101906	0.836522	0.500881	0.0514828	3.4e-16	4.37e-18	-0.836043
ENSG00000165168	CYBB	cytochrome b-245 beta chain	0.7957	0.207635	0.420221	0.0847196	0.00732145	0.586457	0.349846	0.0284863	0.763212	3.02e-13	1.35e-14	-1.84327
ENSG00000109610	SOD3	superoxide dismutase 3, extracellular	0.906012	0.501786	0.158934	0.83199	0.646149	-0.0433994	0.497437	0.0681651	-0.118722	0.47841	0.349608	-0.308511
ENSG00000266412	NCOA4	nuclear receptor coactivator 4	0.972987	0.83393	-0.0358482	0.144772	0.0214478	0.144508	0.775589	0.373744	0.10078	0.964721	0.964721	-0.00513631
ENSG00000086991	NOX4	NADPH oxidase 4	0.983769	0.968898	0.00440753	0.83199	0.599439	0.0470473	0.775589	0.373591	-0.0932029	0.728799	0.644706	-0.352392
ENSG00000179593	ALOX15B	arachidonate 15-lipoxygenase, type B	0.95491	0.727943	0.0427418	0.111165	0.0128946	-0.144661	0.646682	0.172948	-0.106682	0.47841	0.348629	0.82561
ENSG00000095303	PTGS1	prostaglandin-endoperoxide synthase 1	0.972987	0.836645	-0.0328805	0.111165	0.0130379	0.221396	0.91256	0.680443	0.033593	0.00257065	0.000790969	-0.589184
ENSG00000090339	ICAM1	intercellular adhesion molecule 1	0.153952	0.004558	1.94495	0.877929	0.715349	-0.0586054	0.90404	0.602559	0.0689932	0.000222926	4.57e-05	-0.669263
ENSG00000136810	TXN	thioredoxin	0.606063	0.0899771	-0.343226	0.00261031	3.2226e-05	-0.611384	0.775589	0.375927	0.141514	0.128714	0.0684823	0.193361
ENSG00000144035	NAT8	N-acetyltransferase 8 (putative)	0.850895	0.309351	-0.375717	0.439688	0.160234	-0.244427	0.927293	0.821693	-0.0551532	0.00494274	0.00158421	0.602346
ENSG00000206172	HBA1	hemoglobin subunit alpha 1	0.906012	0.480816	0.482495	0.723073	0.401707	0.153133	0.516365	0.0818176	0.356552	0.343846	0.233639	0.379012
ENSG00000005381	MPO	myeloperoxidase	0.972987	0.871459	-0.0229137	0.439688	0.153419	0.162354	0.646682	0.214695	-0.108784	0.107174	0.0529371	-1.24838
ENSG00000160211	G6PD	glucose-6-phosphate dehydrogenase	0.153952	0.00216032	0.863958	0.079445	0.00469814	0.203739	0.969991	0.952218	0.00407597	0.128714	0.0675976	-0.349012
ENSG00000099998	GGT5	gamma-glutamyltransferase 5	0.906012	0.486937	0.1806	0.374061	0.0984618	0.164248	0.90404	0.604058	-0.053199	0.886011	0.863293	0.0304665
ENSG00000244734	HBB	hemoglobin subunit beta	0.91548	0.57816	0.460047	0.659498	0.33382	0.281016	0.408558	0.0426874	0.803956	2.25e-09	2.02e-10	2.85369
ENSG00000077150	NFKB2	nuclear factor kappa B subunit 2	0.515981	0.047776	0.402679	0.902561	0.746563	-0.0317199	0.924924	0.810736	-0.0274543	0.876014	0.842321	0.0316259
ENSG00000012779	ALOX5	arachidonate 5-lipoxygenase	0.153952	0.00330716	0.798467	0.079445	0.00508286	0.330687	0.896694	0.586726	0.0507566	2.61e-07	3.01e-08	-1.23677
ENSG00000125538	IL1B	interleukin 1 beta	0.606063	0.0920485	1.28689	0.599281	0.273228	0.27499	0.90404	0.631418	0.095598	0.576686	0.454694	-0.417482
ENSG00000101460	MAP1LC3A	microtubule associated protein 1 light chain 3 alpha	0.449421	0.0388389	0.823246	0.374061	0.101916	0.164224	0.914185	0.77875	-0.0223235	6.06e-05	1.05e-05	1.01021
ENSG00000073756	PTGS2	prostaglandin-endoperoxide synthase 2	0.606063	0.0757381	1.15086	0.407598	0.125802	0.363897	0.968444	0.932576	0.0120894	0.154771	0.0890412	0.952584
ENSG00000171223	JUNB	JunB proto-oncogene, AP-1 transcription factor subunit	0.7957	0.16278	0.949665	0.710176	0.390158	0.258144	0.913702	0.710734	0.0707394	0.258374	0.167281	-0.486122
ENSG00000177606	JUN	Jun proto-oncogene, AP-1 transcription factor subunit	0.906012	0.377606	0.718729	0.374061	0.0982447	0.471207	0.914185	0.767694	0.0720331	0.00518403	0.00171853	0.764503
ENSG00000132965	ALOX5AP	arachidonate 5-lipoxygenase activating protein	0.159912	0.00690977	2.28367	0.205904	0.0383094	0.329328	0.632788	0.150411	0.177705	0.795254	0.744277	-0.0837519
ENSG00000100031	GGT1	gamma-glutamyltransferase 1	0.829787	0.285077	0.690887	0.669388	0.34709	0.124266	0.646682	0.231042	-0.223007	0.538281	0.417512	-0.153894
ENSG00000108691	CCL2	C-C motif chemokine ligand 2	0.7957	0.207019	1.39681	0.916713	0.84767	0.0592346	0.75486	0.319267	0.299035	0.00572127	0.00201711	0.602452
ENSG00000170345	FOS	Fos proto-oncogene, AP-1 transcription factor subunit	0.983769	0.95862	-0.0707579	0.600377	0.280324	0.663469	0.775589	0.392582	0.31515	0.00179978	0.000542241	-1.69267
ENSG00000106366	SERPINE1	serpin family E member 1	0.7957	0.220281	1.3171	0.40377	0.122128	0.58751	0.24784	0.00628526	1.22962	4.14e-09	4.25e-10	1.93777
ENSG00000068366	ACSL4	acyl-CoA synthetase long-chain family member 4	0.983769	0.971624	0.0135502	0.238395	0.0500334	0.5314	0.83194	0.493001	-0.231224	0.0014632	0.000407019	1.84543

## Sheet: Suppl Table 2. HC vs NASH
			Supplementary Table 2. Differential gene expression of genes included in the analysis in NASH compared to Normal Weight Healthy Controls (HC) (Frades et al. [24], Suppli et al. [28], Lake et al. [29], Horvath et al. [30]). Significant adjusted P-values in bold.
ENSG_ID	Gene name	Full gene name	Frades_adj.p_value	Frades_p_value	Frades_logFC	Horvath_adj.p_value	Horvath_p_value	Horvath_logFC	Lake_adj.p_value	Lake_p_value	Lake_logFC	Suppli_adj.p_value	Suppli_p_value	Suppli_logFC
Selenoproteins
ENSG00000197763	TXNRD3	thioredoxin reductase 3	0.602555	0.254376	-0.106125	0.353775	0.185135	-0.0874918	0.0065813	0.0025594	-0.219552	1.20136e-05	2.54135e-06	-0.445324
ENSG00000113811	SELENOK	selenoprotein K	0.671718	0.327566	0.104044	0.817613	0.682241	-0.0457008	0.000392319	8.71821e-05	-0.589409	1.81542e-09	1.86197e-10	0.582248
ENSG00000184470	TXNRD2	thioredoxin reductase 2	0.985696	0.979857	-0.00368794	0.817613	0.682647	-0.0305022	5.98291e-05	9.23288e-06	-0.341789	0.211587	0.146483	-0.199677
ENSG00000179918	SEPHS2	selenophosphate synthetase 2	0.484166	0.0968169	0.201801	0.103676	0.023039	-0.200619	8.41733e-06	8.833e-07	-0.372382	2.23063e-07	3.14577e-08	0.343039
ENSG00000186838	SELENOV	selenoprotein V	#N/A	#N/A	#N/A	0.353775	0.184426	-0.0835574	0.00258624	0.000878043	-0.22989	NA	NA	NA
ENSG00000211450	SELENOH	selenoprotein H	0.602555	0.25471	0.0731231	0.420547	0.241425	-0.0929224	0.107306	0.0669476	-0.105811	0.84719	0.803744	0.0938349
ENSG00000250722	SELENOP	selenoprotein P	0.566993	0.209388	0.217864	0.0214621	0.00198723	-0.190143	0.247767	0.178943	0.203774	0.731184	0.665565	-0.0575796
ENSG00000183291	SELENOF	selenoprotein F	0.588861	0.236272	0.225055	0.194331	0.0671763	-0.110813	0.000379482	8.19868e-05	-0.458553	2.11301e-05	4.60528e-06	0.217299
ENSG00000138018	SELENOI	selenoprotein I	0.484166	0.108901	0.44066	0.990493	0.986741	0.00154881	0.00711277	0.00286947	-0.423376	0.708176	0.635542	-0.0639118
ENSG00000198736	MSRB1	methionine sulfoxide reductase B1	0.749061	0.443888	-0.0941173	0.647733	0.463808	-0.0509104	2.73006e-06	2.35931e-07	-0.62789	0.672568	0.596561	0.0584768
ENSG00000198843	SELENOT	selenoprotein T	0.446158	0.0385569	0.308162	0.817613	0.686001	0.039258	0.000560081	0.000141749	-0.368797	4.19567e-06	7.53069e-07	0.336987
ENSG00000131871	SELENOS	selenoprotein S	0.450162	0.0639119	0.195806	0.353775	0.178571	-0.135148	0.0176066	0.00804254	-0.263277	3.35164e-18	1.28909e-19	0.84771
ENSG00000197406	DIO3	deiodinase, iodothyronine type III	0.692222	0.383319	-0.0959357	0.187746	0.063741	-0.151345	0.0559049	0.0315939	-0.144073	7.45673e-07	1.20956e-07	-2.90377
ENSG00000211448	DIO2	deiodinase, iodothyronine type II	0.698685	0.392471	-0.0597513	0.688364	0.50565	0.0380885	0.0124666	0.00530985	-0.174948	0.631155	0.550238	0.642855
ENSG00000211452	DIO1	deiodinase, iodothyronine type I	0.468355	0.0760518	0.339101	0.475086	0.281532	-0.131447	0.0752914	0.0441523	-0.482098	0.00435014	0.00161736	0.503412
ENSG00000198704	GPX6	glutathione peroxidase 6	#N/A	#N/A	#N/A	0.619156	0.418139	-0.05228	0.213809	0.151973	-0.111374	NA	NA	NA
ENSG00000211445	GPX3	glutathione peroxidase 3	0.644026	0.302136	-0.240364	0.933066	0.85819	-0.0196982	0.0559049	0.0312711	0.292004	0.00858638	0.00341253	0.388859
ENSG00000178980	SELENOW	selenoprotein W	0.984118	0.951065	0.0128606	0.310779	0.136206	0.13835	0.677931	0.631898	-0.043831	1.66627e-07	2.24306e-08	0.776649
ENSG00000167468	GPX4	glutathione peroxidase 4	0.447629	0.059763	0.239169	0.0485324	0.00808873	0.175535	0.184076	0.126126	-0.135861	0.800125	0.743706	-0.0409593
ENSG00000073169	SELENOO	selenoprotein O	0.904792	0.780764	-0.106695	0.262298	0.103239	0.122875	0.000153367	2.55612e-05	-0.365828	2.496e-05	5.69405e-06	-0.833668
ENSG00000233276	GPX1	glutathione peroxidase 1	0.920057	0.840172	0.0685412	0.0458775	0.00728101	0.191965	0.0281485	0.0140743	-0.242703	0.136253	0.0838482	-0.349966
ENSG00000198431	TXNRD1	thioredoxin reductase 1	0.771809	0.471661	0.164943	0.933066	0.855933	0.015079	0.402307	0.325322	0.133264	0.0225553	0.0104101	0.279772
ENSG00000198832	SELENOM	selenoprotein M	0.566993	0.213497	-0.297973	0.951299	0.886224	0.0132736	0.79791	0.763433	0.0199664	0.121838	0.0726342	0.453986
ENSG00000162430	SELENON	selenoprotein N	0.968325	0.908552	-0.0164206	0.0246692	0.00273671	0.242457	0.0655013	0.0376026	0.155473	0.00906028	0.00365896	-0.400467
ENSG00000176153	GPX2	glutathione peroxidase 2	0.877049	0.741702	-0.258448	0.987613	0.963227	0.0126359	2.02794e-05	2.62881e-06	-1.50217	0.0117432	0.00496828	1.16034
Other genes involved in included pathways
ENSG00000140465	CYP1A1	cytochrome P450 family 1 subfamily A member 1	0.812044	0.564271	-0.219832	6.11705e-06	3.77596e-08	-1.75641	0.595347	0.536547	-0.276598	5.85717e-06	1.08883e-06	-1.91515
ENSG00000134184	GSTM1	glutathione S-transferase mu 1	0.853829	0.690442	0.328559	0.91052	0.820592	0.137216	0.451363	0.37335	-0.52009	0.766881	0.702974	-0.480924
ENSG00000277656	GSTT1	glutathione S-transferase theta 1	0.721423	0.418603	-0.338074	0.736617	0.573578	-0.267703	0.730992	0.694893	-0.125837	#N/A	#N/A	#N/A
ENSG00000099984	GSTT2	glutathione S-transferase theta 2 (gene/pseudogene)	0.810823	0.525533	0.18603	0.167916	0.0520046	-0.576552	0.399701	0.320748	-0.115573	#N/A	#N/A	#N/A
ENSG00000189221	MAOA	monoamine oxidase A	0.517633	0.185325	0.169047	0.262298	0.101887	-0.123061	0.00195605	0.000603721	-0.495176	1.3684e-10	1.22805e-11	-0.779197
ENSG00000116761	CTH	cystathionine gamma-lyase	0.812044	0.606514	0.144212	0.512615	0.306936	-0.152991	0.927163	0.915716	0.0210535	0.023168	0.0108414	-0.377191
ENSG00000160200	CBS	cystathionine-beta-synthase	0.468355	0.0786321	-0.286664	0.00918409	0.000680303	-0.258943	0.000411226	9.39219e-05	-0.705148	0.00296514	0.00108342	-1.51927
ENSG00000117009	KMO	kynurenine 3-monooxygenase	0.920057	0.840546	0.0367386	0.290627	0.120198	-0.183566	0.351668	0.277861	0.207411	0.837805	0.78947	-0.047976
ENSG00000141504	SAT2	spermidine/spermine N1-acetyltransferase family member 2	0.588861	0.235114	-0.216076	0.0790141	0.01512	-0.254722	0.263336	0.193438	-0.139821	0.361473	0.275739	0.149224
ENSG00000109618	SEPSECS	Sep (O-phosphoserine) tRNA:Sec (selenocysteine) tRNA synthase	0.812044	0.591585	-0.0721325	0.155127	0.0428145	-0.169799	0.559969	0.487604	-0.0823483	0.589665	0.498947	0.107008
ENSG00000132330	SCLY	selenocysteine lyase	0.00978972	6.04303e-05	-0.506301	0.0592247	0.0106019	-0.285598	1.94381e-06	1.55984e-07	-0.465776	0.218922	0.152965	0.494572
ENSG00000115919	KYNU	kynureninase	0.447629	0.0519278	0.299862	0.350827	0.173248	-0.108019	0.166892	0.112291	-0.202059	0.0133759	0.00583052	-0.315132
ENSG00000142168	SOD1	superoxide dismutase 1, soluble	0.692222	0.373409	0.0992514	0.036142	0.00490817	-0.173729	0.0430578	0.0228579	-0.284297	0.0363332	0.0179337	-0.185416
ENSG00000180210	F2	coagulation factor II, thrombin	0.964289	0.898812	0.0122221	0.34755	0.169484	-0.113067	0.0013034	0.000386194	-0.398947	0.563507	0.462364	-0.07928
ENSG00000138821	SLC39A8	solute carrier family 39 member 8	0.692222	0.373171	0.125078	0.353775	0.186005	-0.106665	0.000892783	0.000259017	-0.462496	0.459033	0.358987	0.0881216
ENSG00000165029	ABCA1	ATP binding cassette subfamily A member 1	0.447629	0.0591276	0.226983	0.167916	0.050482	-0.158356	2.02794e-05	2.59163e-06	-0.727598	6.23295e-06	1.19864e-06	-1.13377
ENSG00000273259	SERPINA3	serpin family A member 3	0.984118	0.947179	0.0125477	1.39044e-05	2.57488e-07	-0.293847	2.06303e-08	7.64085e-10	-1.08341	0.177351	0.118328	0.362007
ENSG00000187193	MT1X	metallothionein 1X	0.50713	0.169043	0.334055	0.71955	0.550767	-0.0516509	0.00213742	0.000672892	-0.947333	4.28923e-22	5.49901e-24	-2.42824
ENSG00000122194	PLG	plasminogen	0.486196	0.15006	0.206802	0.000995121	2.45709e-05	-0.246342	0.0251004	0.0122403	-0.328674	5.99999e-12	4.4501e-13	-1.15389
ENSG00000110911	SLC11A2	solute carrier family 11 member 2	0.389766	0.0287769	-0.266696	0.00918409	0.000639501	-0.251938	0.00238734	0.000781043	-0.333171	0.0310465	0.0149262	-0.361264
ENSG00000116044	NFE2L2	nuclear factor, erythroid 2 like 2	0.737965	0.432757	0.219572	0.619156	0.420414	-0.0808495	0.000885075	0.000251318	0.514632	2.496e-05	5.76e-06	-0.428532
ENSG00000177000	MTHFR	methylenetetrahydrofolate reductase	0.446732	0.0413641	-0.129639	0.167916	0.048154	-0.186228	0.275042	0.20713	-0.132079	0.233574	0.167694	-0.22474
ENSG00000197142	ACSL5	acyl-CoA synthetase long-chain family member 5	0.484166	0.146445	0.308231	0.521933	0.319199	-0.0858133	0.026541	0.0131067	-0.55973	0.000130614	3.51652e-05	-0.576601
ENSG00000213366	GSTM2	glutathione S-transferase mu 2	0.853829	0.690442	0.328559	0.690406	0.519935	0.13186	0.0286426	0.0144981	0.487762	0.275439	0.199516	0.654789
ENSG00000047457	CP	ceruloplasmin	0.916958	0.820734	0.0310595	0.00537273	0.000309236	-0.154563	0.144183	0.0952319	-0.181065	0.000130671	3.60183e-05	-0.758747
ENSG00000148965	SAA4	serum amyloid A4, constitutive	0.447629	0.0596921	0.422675	0.200623	0.0705894	-0.146823	2.81824e-06	2.60948e-07	-0.95731	0.29759	0.223193	-0.294464
ENSG00000104635	SLC39A14	solute carrier family 39 member 14	0.447629	0.0607891	0.704569	0.121526	0.0284754	-0.179214	3.73801e-08	1.61519e-09	-1.17686	0.208818	0.141889	-0.158168
ENSG00000057593	F7	coagulation factor VII	0.593808	0.241922	0.185972	0.262298	0.10062	-0.168222	0.135562	0.0887008	-0.216094	7.0901e-08	9.08987e-09	-0.76881
ENSG00000173432	SAA1	serum amyloid A1	0.985696	0.985696	0.0110391	0.951299	0.890771	-0.0534133	2.06303e-08	5.95088e-10	-3.20021	0.00136445	0.000481055	1.49299
ENSG00000006625	GGCT	gamma-glutamylcyclotransferase	0.864429	0.719524	-0.0390742	0.953888	0.907375	0.011912	0.203048	0.141632	-0.114666	4.24593e-17	1.90523e-18	1.1915
ENSG00000151726	ACSL1	acyl-CoA synthetase long-chain family member 1	0.0942067	0.00116305	0.571576	0.331363	0.149612	0.0698636	0.000174101	3.01566e-05	-0.611833	0.137636	0.0855811	-0.238174
ENSG00000138449	SLC40A1	solute carrier family 40 member 1	0.498356	0.163042	-0.217093	0.445197	0.258324	-0.105123	0.471573	0.395889	0.153662	7.85652e-06	1.56123e-06	-0.45018
ENSG00000123131	PRDX4	peroxiredoxin 4	0.827114	0.648417	0.072145	0.103543	0.0223704	-0.189118	4.14776e-07	2.81638e-08	-0.982652	7.27637e-07	1.11944e-07	0.57875
ENSG00000182793	GSTA5	glutathione S-transferase alpha 5	#N/A	#N/A	#N/A	0.147341	0.0363804	-0.138457	0.896122	0.873996	0.0189604	0.0307621	0.0145923	1.88122
ENSG00000132693	CRP	C-reactive protein	0.602555	0.27044	0.652234	0.167916	0.0523796	0.651351	1.02383e-05	1.13758e-06	-1.63635	0.00754921	0.00295193	1.3458
ENSG00000100348	TXN2	thioredoxin 2	0.812044	0.572627	-0.0766175	0.017743	0.00153334	-0.263298	0.0152184	0.00676374	-0.301222	0.539271	0.435565	-0.0713454
ENSG00000171105	INSR	insulin receptor	0.984118	0.936392	0.00611741	0.0232609	0.00229737	-0.187841	0.17593	0.119459	0.153175	0.118813	0.070069	-0.35839
ENSG00000117862	TXNDC12	thioredoxin domain containing 12	0.468355	0.0809502	-0.156025	0.262298	0.0969835	-0.183302	0.0352552	0.0182502	-0.196462	0.0344244	0.0167708	0.228219
ENSG00000112062	MAPK14	mitogen-activated protein kinase 14	0.11426	0.00309756	0.381403	0.355731	0.191041	0.0879105	0.102656	0.0633681	-0.136109	0.529948	0.421975	0.0553975
ENSG00000138413	IDH1	isocitrate dehydrogenase (NADP+)) 1, cytosolic	0.914694	0.801769	0.0384462	0.74421	0.588018	-0.0415264	0.10878	0.0698339	-0.288536	0.61086	0.524713	-0.0624903
ENSG00000156482	RPL30	ribosomal protein L30	0.812044	0.621564	0.0444294	0.0458775	0.00736306	-0.111518	0.128212	0.0831002	0.165202	0.924274	0.8828	-0.0137445
ENSG00000197111	PCBP2	poly(rC) binding protein 2	0.602555	0.266026	0.125055	0.823884	0.701827	0.0191098	0.107306	0.0682255	0.134765	0.826112	0.773156	0.0321361
ENSG00000111684	LPCAT3	lysophosphatidylcholine acyltransferase 3	0.484166	0.128784	0.278856	0.563203	0.351133	-0.102962	3.07589e-07	1.70883e-08	-1.21964	0.589406	0.49495	-0.10492
ENSG00000115107	STEAP3	STEAP3 metalloreductase	0.482236	0.0893029	-0.406875	0.262298	0.0984222	-0.11278	6.72537e-07	4.98176e-08	-0.903294	0.560456	0.456268	-0.101816
ENSG00000001084	GCLC	glutamate-cysteine ligase catalytic subunit	0.469478	0.0840424	0.245477	0.572786	0.364179	-0.0651512	0.512638	0.436692	-0.0749389	0.72863	0.65857	0.0458083
ENSG00000243955	GSTA1	glutathione S-transferase alpha 1	0.204324	0.0113513	0.752413	0.633773	0.438164	0.0736415	0.213809	0.153098	0.763656	0.139401	0.0875725	0.260083
ENSG00000074771	NOX3	NADPH oxidase 3	0.812044	0.613099	0.0371045	0.56801	0.357636	-0.0488711	0.0210556	0.0100079	-0.146364	NA	NA	NA
ENSG00000197769	MAP1LC3C	microtubule associated protein 1 light chain 3 gamma	0.507746	0.178651	-0.157287	0.647091	0.457227	-0.0595785	0.0882356	0.0539218	-0.114291	0.192182	0.128122	-1.51613
ENSG00000158125	XDH	xanthine dehydrogenase	0.797401	0.511912	0.116297	0.59508	0.382364	0.0679669	0.203048	0.140442	-0.266778	0.0946803	0.0521956	-0.305296
ENSG00000185591	SP1	Sp1 transcription factor	0.507746	0.172817	0.192206	0.64438	0.449475	-0.0470548	0.00675221	0.00266754	0.218784	6.04035e-19	1.54881e-20	-0.807234
ENSG00000057663	ATG5	autophagy related 5	0.573868	0.219629	0.127987	0.353775	0.187806	-0.0816836	0.957985	0.952072	-0.00527396	4.0192e-10	3.86462e-11	0.588521
ENSG00000072274	TFRC	transferrin receptor	0.812044	0.619144	-0.134525	0.967933	0.935644	-0.0147828	0.914727	0.897788	-0.0314329	0.211587	0.145852	0.49881
ENSG00000171867	PRNP	prion protein	0.484166	0.111557	0.389051	0.990493	0.982681	0.00218163	0.269793	0.199847	-0.125556	0.672568	0.599275	-0.0609581
ENSG00000134339	SAA2	serum amyloid A2	0.984118	0.965894	-0.0281089	0.967933	0.938059	0.0304008	2.06303e-08	6.55901e-10	-3.18343	5.99999e-12	4.61538e-13	2.7348
ENSG00000116984	MTR	5-methyltetrahydrofolate-homocysteine methyltransferase	0.770344	0.46601	0.0875156	0.00537273	0.00033165	0.251681	4.7569e-08	2.34909e-09	0.608659	9.80148e-06	2.01056e-06	-0.901804
ENSG00000165637	VDAC2	voltage dependent anion channel 2	0.484166	0.0983905	0.190668	0.59508	0.3857	-0.0693511	0.632535	0.573967	0.0731151	0.140026	0.0888625	-0.144003
ENSG00000166825	ANPEP	alanyl aminopeptidase, membrane	0.484166	0.119272	-0.286351	0.521933	0.322181	-0.0609236	5.6453e-05	8.36341e-06	-0.606141	7.16031e-15	3.67195e-16	-0.838013
ENSG00000008394	MGST1	microsomal glutathione S-transferase 1	0.492756	0.158169	0.154961	0.377697	0.2075	-0.0805515	0.0208897	0.00980009	-0.330414	0.66678	0.585569	-0.0512539
ENSG00000108439	PNPO	pyridoxamine 5'-phosphate oxidase	0.788166	0.496253	-0.0792462	0.849084	0.744259	0.0302492	0.00055685	0.000137494	-0.494915	8.03831e-05	1.97649e-05	-0.515195
ENSG00000163586	FABP1	fatty acid binding protein 1	0.904792	0.787504	0.0351646	0.953888	0.901947	-0.0102846	0.165712	0.110475	-0.319094	2.05385e-14	1.31657e-15	1.35784
ENSG00000023909	GCLM	glutamate-cysteine ligase modifier subunit	0.484166	0.102322	0.589245	0.167916	0.0528623	-0.229415	0.000188831	3.73e-05	0.711636	0.141266	0.090555	-0.284837
ENSG00000136244	IL6	interleukin 6	0.984118	0.962231	0.021018	0.817613	0.691438	-0.110062	0.00600669	0.00229886	1.01786	0.933909	0.913302	0.313069
ENSG00000178814	OPLAH	5-oxoprolinase (ATP-hydrolysing)	0.692222	0.344495	-0.214483	0.690406	0.517988	-0.0609351	0.000710555	0.000188568	-0.320003	0.000497924	0.000169166	-0.756244
ENSG00000104835	SARS2	seryl-tRNA synthetase 2, mitochondrial	0.468355	0.0807969	-0.348832	0.262298	0.105243	-0.130156	0.000838336	0.000232871	-0.233727	0.0136201	0.00602428	0.581234
ENSG00000167996	FTH1	ferritin heavy chain 1	0.716186	0.411144	0.113154	0.420467	0.238784	-0.0439524	0.0784029	0.0469449	0.171464	0.0573784	0.0301605	0.256183
ENSG00000255346	NOX5	NADPH oxidase 5	0.812044	0.610823	-0.0346346	0.167916	0.0493875	-0.114904	0.00169226	0.000511855	-0.169537	0.998738	0.998738	0.00182224
ENSG00000117450	PRDX1	peroxiredoxin 1	0.484166	0.139349	-0.147381	0.951299	0.892577	-0.00960143	0.000285018	5.80592e-05	-0.404789	0.000306118	9.41902e-05	0.322726
ENSG00000091513	TF	transferrin	0.985696	0.979277	-0.00429759	0.797213	0.639739	-0.0164881	0.42937	0.352507	-0.0935506	0.0948533	0.0528989	-0.233711
ENSG00000165672	PRDX3	peroxiredoxin 3	0.484166	0.11842	0.164331	0.690406	0.516503	-0.0334023	0.000710555	0.000188604	-0.420444	0.0782398	0.0426307	0.191532
ENSG00000130066	SAT1	spermidine/spermine N1-acetyltransferase 1	0.11426	0.00454	0.594211	0.410622	0.230658	-0.0803543	3.78948e-06	3.7427e-07	0.831714	0.589406	0.492948	0.106821
ENSG00000109320	NFKB1	nuclear factor kappa B subunit 1	0.484166	0.133878	0.324194	0.121526	0.0292563	0.171876	0.0176066	0.00799972	0.287083	0.447242	0.346899	-0.0832214
ENSG00000148834	GSTO1	glutathione S-transferase omega 1	0.812044	0.58931	-0.0721732	0.0156228	0.00125368	-0.305829	0.819716	0.789356	-0.0358195	0.000358404	0.000112576	0.325759
ENSG00000163631	ALB	albumin	0.920913	0.847013	-0.028026	0.332328	0.155907	-0.0348874	0.396304	0.315576	0.0482016	0.205789	0.138512	-0.219581
ENSG00000143416	SELENBP1	selenium binding protein 1	0.920057	0.83574	-0.0424072	0.901246	0.806671	-0.0298042	0.0352552	0.0182805	-0.554455	0.147052	0.0952065	0.158966
ENSG00000180098	TRNAU1AP	tRNA selenocysteine 1 associated protein 1	0.692222	0.368738	-0.0646012	0.611064	0.402138	-0.0449155	0.107306	0.0682149	0.133889	0.0778019	0.0418933	0.296573
ENSG00000172845	SP3	Sp3 transcription factor	0.812044	0.596628	0.0457254	0.0917135	0.0192485	-0.139032	0.343011	0.268903	0.0668487	0.0953398	0.0537814	-0.295215
ENSG00000121691	CAT	catalase	0.11426	0.00493716	0.428346	0.0249578	0.00292715	0.181104	0.479736	0.405703	-0.154955	0.000181658	5.1237e-05	-0.387023
ENSG00000007952	NOX1	NADPH oxidase 1	0.484166	0.108459	-0.122407	0.172404	0.0553397	-0.0881978	0.0425107	0.022305	-0.141214	NA	NA	NA
ENSG00000104368	PLAT	plasminogen activator, tissue type	0.864429	0.72274	0.116691	0.173262	0.0566846	0.272905	2.06303e-08	3.33435e-10	0.971019	0.608855	0.519088	0.133288
ENSG00000151012	SLC7A11	solute carrier family 7 member 11	0.770344	0.464097	0.0460573	0.817613	0.687923	-0.0396967	0.723966	0.679277	0.0888145	0.18048	0.119163	1.43154
ENSG00000084674	APOB	apolipoprotein B	0.566993	0.21217	0.374128	0.353775	0.18737	-0.0330672	0.0762456	0.0451826	-0.195342	4.74336e-05	1.12503e-05	-0.808106
ENSG00000140941	MAP1LC3B	microtubule associated protein 1 light chain 3 beta	0.11426	0.00413388	0.595423	0.71955	0.548981	-0.0602899	0.277254	0.212071	0.135225	0.0778019	0.0415067	0.153243
ENSG00000135002	RFK	riboflavin kinase	0.602555	0.271522	0.111248	0.953888	0.91267	0.0117977	0.00362375	0.00128384	-0.21723	0.000274284	7.91204e-05	0.604764
ENSG00000181019	NQO1	NAD(P)H quinone dehydrogenase 1	0.484166	0.139639	-0.122184	0.310779	0.13254	-0.183543	0.0180043	0.00833532	0.343472	0.0107529	0.00441146	0.735437
ENSG00000123983	ACSL3	acyl-CoA synthetase long-chain family member 3	0.0962455	0.00178232	0.587995	0.343452	0.16506	-0.101064	0.426728	0.347704	-0.0951857	0.116145	0.0677515	0.182697
ENSG00000111537	IFNG	interferon gamma	0.819636	0.632435	0.0415979	0.736617	0.577471	-0.0500568	0.273863	0.204552	0.0842074	0.985284	0.978968	0.0181588
ENSG00000078668	VDAC3	voltage dependent anion channel 3	0.812044	0.593271	-0.043689	0.155127	0.0400041	-0.106947	0.652926	0.60412	0.0518573	9.65309e-05	2.47515e-05	0.381837
ENSG00000160688	FLAD1	flavin adenine dinucleotide synthetase 1	0.786739	0.490498	-0.068883	0.849084	0.738369	0.01713	2.6917e-05	3.6554e-06	-0.266143	7.45673e-07	1.24279e-07	0.439882
ENSG00000118137	APOA1	apolipoprotein A1	0.862602	0.702861	0.03206	0.730741	0.563844	0.0325347	0.968871	0.968871	0.0055045	0.0131804	0.00566079	0.472656
ENSG00000168003	SLC3A2	solute carrier family 3 member 2	0.775971	0.478995	0.0942195	0.155127	0.0430907	-0.209117	0.00366069	0.00133321	-0.447181	0.000106956	2.81103e-05	-0.439802
ENSG00000065621	GSTO2	glutathione S-transferase omega 2	0.484166	0.145104	-0.147046	0.633773	0.437787	-0.0691828	0.727286	0.686881	-0.0333747	0.115858	0.0668412	0.587281
ENSG00000169564	PCBP1	poly(rC) binding protein 1	0.604596	0.276174	0.205247	0.331363	0.153409	0.0756511	0.00288665	0.000997854	-0.298552	0.0526048	0.027314	-0.158926
ENSG00000167815	PRDX2	peroxiredoxin 2	0.692222	0.379706	0.0603295	0.990493	0.990493	-0.000983974	0.000338237	7.09881e-05	-0.402992	0.0166394	0.00746642	-0.313303
ENSG00000126432	PRDX5	peroxiredoxin 5	0.864429	0.718452	0.0994269	0.331363	0.153364	-0.122158	0.012104	0.00508067	-0.195542	8.03831e-05	2.00958e-05	0.49713
ENSG00000166787	SAA3P	serum amyloid A3 pseudogene	0.484166	0.121945	-0.178007	0.901246	0.802914	-0.0206609	3.19507e-07	1.97227e-08	-0.972099	#N/A	#N/A	#N/A
ENSG00000181867	FTMT	ferritin mitochondrial	#N/A	#N/A	#N/A	0.990493	0.985467	0.00120181	0.469087	0.390905	-0.0795002	NA	NA	NA
ENSG00000008441	NFIX	nuclear factor I X	0.812044	0.570858	-0.0426018	0.328093	0.145819	0.156293	0.536124	0.460007	0.0456491	1.76422e-22	1.13091e-24	-1.06328
ENSG00000087086	FTL	ferritin light chain	0.588861	0.233019	0.0930486	0.803652	0.654828	-0.0203809	0.559969	0.494293	-0.0724982	0.00041476	0.000135595	0.36402
ENSG00000073060	SCARB1	scavenger receptor class B member 1	0.484166	0.145354	-0.31117	0.866476	0.764852	0.0196054	0.00362375	0.00129739	-0.651605	0.529948	0.424638	0.0665742
ENSG00000100292	HMOX1	heme oxygenase 1	0.447629	0.0506671	0.999518	0.468492	0.274733	0.232434	0.559969	0.492981	-0.159145	6.80791e-19	2.18202e-20	-1.38831
ENSG00000281938	ACSL6	acyl-CoA synthetase long-chain family member 6	0.812044	0.560111	-0.0403437	0.611064	0.407376	-0.0589104	0.0559049	0.0310592	-0.116657	0.000556095	0.000192494	0.841942
ENSG00000104687	GSR	glutathione-disulfide reductase	0.904792	0.782419	-0.0526175	0.839332	0.720168	-0.019124	0.0559049	0.0317485	0.180193	0.589406	0.490519	0.0670361
ENSG00000141510	TP53	tumor protein p53	0.623446	0.288633	-0.121442	0.849084	0.74394	-0.0299415	0.551427	0.476541	-0.0783069	0.000304364	9.16993e-05	-0.325981
ENSG00000100983	GSS	glutathione synthetase	0.324406	0.0200251	-0.206776	0.797585	0.644961	0.028483	0.00478448	0.00180156	-0.26207	4.88807e-07	7.20678e-08	0.469767
ENSG00000197548	ATG7	autophagy related 7	0.692222	0.366372	0.0844477	0.0435816	0.0061875	0.165965	0.00234065	0.000751321	0.339797	0.529948	0.419316	0.0776277
ENSG00000232810	TNF	tumor necrosis factor	0.692222	0.37465	-0.0938613	0.647091	0.459355	0.072905	0.000506857	0.000118892	-0.312286	0.281213	0.207305	0.583041
ENSG00000132394	EEFSEC	eukaryotic elongation factor, selenocysteine-tRNA specific	0.853829	0.686114	-0.0650617	0.677472	0.489285	-0.0479775	0.00055685	0.000134286	-0.246037	0.147828	0.0966565	-0.137538
ENSG00000173039	RELA	RELA proto-oncogene, NF-kB subunit	0.827114	0.643557	0.0712584	0.922985	0.837523	-0.0165411	0.637011	0.58196	-0.0374807	4.40357e-20	8.4684e-22	-0.866283
ENSG00000165168	CYBB	cytochrome b-245 beta chain	0.484166	0.130412	0.386371	0.187746	0.0632719	0.437286	0.277254	0.212219	0.405912	7.10001e-12	5.91668e-13	-1.54333
ENSG00000109610	SOD3	superoxide dismutase 3, extracellular	0.468355	0.0733949	-0.208066	0.521933	0.319345	0.0954149	0.0222545	0.0107151	0.178718	0.27998	0.204601	0.496191
ENSG00000266412	NCOA4	nuclear receptor coactivator 4	0.389766	0.0312775	0.282342	0.155127	0.0420249	0.133437	0.652926	0.604562	-0.0575072	0.942488	0.930405	0.00950076
ENSG00000086991	NOX4	NADPH oxidase 4	0.864429	0.725693	0.0206347	0.409374	0.22743	0.115161	0.21237	0.149445	0.167428	0.293079	0.217931	0.778065
ENSG00000179593	ALOX15B	arachidonate 15-lipoxygenase, type B	0.961666	0.890431	0.00927457	0.769134	0.612459	0.033747	0.574653	0.510803	-0.0453196	0.0431266	0.0215633	1.75352
ENSG00000095303	PTGS1	prostaglandin-endoperoxide synthase 1	0.692222	0.356024	-0.0849818	0.00200803	6.19763e-05	0.356354	0.892189	0.864652	0.0105844	0.361407	0.273372	-0.220542
ENSG00000090339	ICAM1	intercellular adhesion molecule 1	0.204324	0.0101538	1.05933	0.688364	0.502819	0.115062	0.259931	0.189333	0.183154	0.000442998	0.000147666	-0.529378
ENSG00000136810	TXN	thioredoxin	0.507746	0.175587	0.198679	0.0865834	0.0171029	-0.298267	0.000188831	3.72025e-05	0.547373	0.00217348	0.000780223	0.389094
ENSG00000144035	NAT8	N-acetyltransferase 8 (putative)	0.484166	0.135783	-0.485421	0.262298	0.104327	-0.253384	0.0131004	0.00566068	0.735995	0.000375686	0.000120412	0.877483
ENSG00000206172	HBA1	hemoglobin subunit alpha 1	0.812044	0.58001	-0.199511	0.0917135	0.0188774	0.423233	0.00258624	0.000873606	0.80346	0.0462609	0.0237051	0.871577
ENSG00000005381	MPO	myeloperoxidase	0.812044	0.602606	0.0452827	0.262298	0.101817	0.189134	0.329926	0.256609	-0.0775944	0.00561294	0.00212284	-2.37296
ENSG00000160211	G6PD	glucose-6-phosphate dehydrogenase	0.812044	0.594499	0.0595567	0.0246692	0.00274102	0.217107	0.0722391	0.0419165	0.159492	0.0996112	0.0568295	-0.333761
ENSG00000099998	GGT5	gamma-glutamyltransferase 5	0.847828	0.669889	-0.0683165	0.00397913	0.0001965	0.399937	0.000184156	3.4103e-05	0.615979	0.0117258	0.00488574	0.502486
ENSG00000244734	HBB	hemoglobin subunit beta	0.984118	0.9542	0.0251845	0.155127	0.0424768	0.570592	0.000737775	0.000200383	1.56624	2.87249e-06	4.97162e-07	2.21975
ENSG00000077150	NFKB2	nuclear factor kappa B subunit 2	0.716186	0.408012	0.0934747	0.290627	0.118473	0.186	0.00711277	0.0028978	0.313196	0.0225553	0.0102791	0.382448
ENSG00000012779	ALOX5	arachidonate 5-lipoxygenase	0.492756	0.155566	0.264637	0.00397913	0.000180965	0.468833	0.313727	0.242073	0.108398	0.00602593	0.00231767	-0.723337
ENSG00000125538	IL1B	interleukin 1 beta	0.602555	0.261629	0.531346	0.356861	0.19385	0.311387	0.0811627	0.0490984	0.315699	0.933909	0.905771	-0.0494605
ENSG00000101460	MAP1LC3A	microtubule associated protein 1 light chain 3 alpha	0.669913	0.318415	0.20818	0.053044	0.0091681	0.272741	0.591441	0.529377	0.0431036	2.21651e-09	2.41543e-10	1.17916
ENSG00000073756	PTGS2	prostaglandin-endoperoxide synthase 2	0.886257	0.754959	0.1388	0.0458775	0.00729099	0.776618	0.000174101	3.11662e-05	1.02558	0.134518	0.0819182	0.980363
ENSG00000171223	JUNB	JunB proto-oncogene, AP-1 transcription factor subunit	0.602555	0.259563	0.380137	0.310779	0.134761	0.478493	0.0107358	0.00444012	0.542835	0.924389	0.888836	-0.0467861
ENSG00000177606	JUN	Jun proto-oncogene, AP-1 transcription factor subunit	0.671718	0.32597	0.39756	0.0293475	0.00362315	0.879947	2.06303e-08	5.99816e-10	1.45587	2.57127e-08	2.96684e-09	1.43435
ENSG00000132965	ALOX5AP	arachidonate 5-lipoxygenase activating protein	0.389766	0.0300738	1.25109	0.036134	0.00468404	0.467375	0.0149043	0.00653214	0.317455	0.230501	0.16401	0.326155
ENSG00000100031	GGT1	gamma-glutamyltransferase 1	0.797401	0.507955	-0.225178	0.121526	0.0289538	0.290357	0.0512681	0.0275329	-0.336419	0.447242	0.34467	0.134123
ENSG00000108691	CCL2	C-C motif chemokine ligand 2	0.692222	0.350255	0.695629	0.310779	0.133354	0.483134	1.14482e-05	1.34269e-06	1.99779	0.000287731	8.48438e-05	0.840477
ENSG00000170345	FOS	Fos proto-oncogene, AP-1 transcription factor subunit	0.692222	0.384568	-0.607821	0.343452	0.165366	0.866933	4.54784e-05	6.45681e-06	1.68099	0.0462609	0.0237235	-1.01715
ENSG00000106366	SERPINE1	serpin family E member 1	0.484166	0.132527	1.17688	0.0744229	0.013782	0.971889	0.000132247	2.12248e-05	1.52986	9.24469e-15	5.33347e-16	2.48472
ENSG00000068366	ACSL4	acyl-CoA synthetase long-chain family member 4	0.447629	0.0577985	0.688498	0.00322653	0.000119501	0.980014	0.00402777	0.00149177	1.00533	4.00729e-08	4.88067e-09	2.69666

## Sheet: Suppl Table 3. HOC vs steatosis
Supplementary Table 3. Differential gene expression of genes included in the analysis in steatosis compared to Healthy Obese Controls (HOC) (Suppli et al. [28], Horvath et al. [30]). Significant adjusted P-values in bold.
ENSG_ID	Gene name	Full gene name	Horvath_adj.p_value	Horvath_p_value	Horvath_logFC	Suppli_adj.p_value	Suppli_p_value	Suppli_logFC
Selenoproteins
ENSG00000197763	TXNRD3	thioredoxin reductase 3	0.120149	0.000741662	-0.242679	6.61e-05	1.14e-05	-0.557999
ENSG00000113811	SELENOK	selenoprotein K	0.514137	0.142816	-0.139031	0.000623055	0.000123812	0.340862
ENSG00000184470	TXNRD2	thioredoxin reductase 2	0.395634	0.0903609	-0.15913	0.296838	0.175058	-0.218028
ENSG00000179918	SEPHS2	selenophosphate synthetase 2	0.733063	0.403325	0.0731344	6e-09	5e-10	0.447079
ENSG00000186838	SELENOV	selenoprotein V	0.366251	0.065376	-0.172208	NA	NA	NA
ENSG00000211450	SELENOH	selenoprotein H	0.12558	0.0031346	-0.201227	0.468022	0.312015	-0.416328
ENSG00000250722	SELENOP	selenoprotein P	0.967925	0.96195	0.00309973	0.316285	0.19261	0.182077
ENSG00000183291	SELENOF	selenoprotein F	0.322124	0.0477221	0.117421	0.179438	0.0897188	0.16051
ENSG00000138018	SELENOI	selenoprotein I	0.776516	0.54999	-0.0554848	0.961329	0.918192	-0.0182649
ENSG00000198736	MSRB1	methionine sulfoxide reductase B1	0.776516	0.561978	-0.0455495	0.603067	0.47163	0.0964002
ENSG00000198843	SELENOT	selenoprotein T	0.732247	0.334483	0.0754074	0.603067	0.466257	0.0545087
ENSG00000131871	SELENOS	selenoprotein S	0.294538	0.0254539	-0.234482	7.71e-10	4.94e-11	0.605288
ENSG00000197406	DIO3	deiodinase, iodothyronine type III	0.713216	0.315381	-0.0863864	0.24939	0.134651	-1.35366
ENSG00000211448	DIO2	deiodinase, iodothyronine type II	0.674934	0.262474	0.0916087	0.985739	0.97942	-0.0355386
ENSG00000211452	DIO1	deiodinase, iodothyronine type I	0.733063	0.344585	0.0959473	7.58e-06	9.72e-07	0.561705
ENSG00000198704	GPX6	glutathione peroxidase 6	0.945549	0.908771	0.00843147	NA	NA	NA
ENSG00000211445	GPX3	glutathione peroxidase 3	0.393059	0.0800675	0.195608	0.00171322	0.000395358	0.48335
ENSG00000178980	SELENOW	selenoprotein W	0.733063	0.35583	-0.0930437	3.19e-08	2.86e-09	1.08661
ENSG00000167468	GPX4	glutathione peroxidase 4	0.78543	0.611831	-0.0389699	0.94959	0.894806	-0.0210814
ENSG00000073169	SELENOO	selenoprotein O	0.565987	0.185169	0.111359	0.00477051	0.00137611	-0.739134
ENSG00000233276	GPX1	glutathione peroxidase 1	0.8599	0.744916	0.0246045	0.00334483	0.000879089	-0.733538
ENSG00000198431	TXNRD1	thioredoxin reductase 1	0.780997	0.585951	-0.0491587	0.72841	0.614713	0.0615515
ENSG00000198832	SELENOM	selenoprotein M	0.75067	0.453195	0.0633295	0.577454	0.425687	-0.185026
ENSG00000162430	SELENON	selenoprotein N	0.12558	0.00520959	0.237741	1.05e-05	1.42e-06	-0.771677
ENSG00000176153	GPX2	glutathione peroxidase 2	0.572326	0.190775	0.310716	0.0058065	0.00178662	1.36306
Other genes involved in included pathways
ENSG00000140465	CYP1A1	cytochrome P450 family 1 subfamily A member 1	0.672551	0.257396	-0.417324	0.214516	0.114133	0.815899
ENSG00000134184	GSTM1	glutathione S-transferase mu 1	0.969772	0.969772	0.0260202	0.830763	0.724255	-0.481619
ENSG00000277656	GSTT1	glutathione S-transferase theta 1	0.548024	0.175909	-0.971453	#N/A	#N/A	#N/A
ENSG00000099984	GSTT2	glutathione S-transferase theta 2 (gene/pseudogene)	0.733063	0.411336	-0.285439	#N/A	#N/A	#N/A
ENSG00000189221	MAOA	monoamine oxidase A	0.12558	0.00697665	-0.183488	0.398104	0.255195	-0.13862
ENSG00000116761	CTH	cystathionine gamma-lyase	0.733063	0.364808	-0.122386	0.0742104	0.0299696	0.355506
ENSG00000160200	CBS	cystathionine-beta-synthase	0.322124	0.0363094	-0.168397	0.268522	0.149752	-0.871449
ENSG00000117009	KMO	kynurenine 3-monooxygenase	0.733063	0.374789	0.0833517	0.719457	0.590971	-0.0799587
ENSG00000141504	SAT2	spermidine/spermine N1-acetyltransferase family member 2	0.713216	0.321387	-0.105019	0.000615742	0.000118412	0.628037
ENSG00000109618	SEPSECS	Sep (O-phosphoserine) tRNA:Sec (selenocysteine) tRNA synthase	0.345172	0.0532673	-0.139137	0.951022	0.902252	-0.0197898
ENSG00000132330	SCLY	selenocysteine lyase	0.833062	0.668507	-0.041639	0.186969	0.0946829	0.55331
ENSG00000115919	KYNU	kynureninase	0.945549	0.914639	0.00989417	0.812079	0.70276	-0.0441194
ENSG00000142168	SOD1	superoxide dismutase 1, soluble	0.12558	0.00195423	-0.235202	0.0498927	0.0198292	0.138127
ENSG00000180210	F2	coagulation factor II, thrombin	0.780997	0.588158	0.0451552	0.362758	0.227886	0.148591
ENSG00000138821	SLC39A8	solute carrier family 39 member 8	0.870194	0.773527	-0.0199885	0.0107868	0.00352645	0.27154
ENSG00000165029	ABCA1	ATP binding cassette subfamily A member 1	0.322124	0.0448945	-0.153289	1.57e-12	5.04e-14	-1.5998
ENSG00000273259	SERPINA3	serpin family A member 3	0.846851	0.709126	-0.0234956	0.393397	0.257626	0.271317
ENSG00000187193	MT1X	metallothionein 1X	0.600465	0.211275	-0.141693	1.03e-09	7.27e-11	-1.69861
ENSG00000122194	PLG	plasminogen	0.776516	0.540493	-0.0427303	4.82e-07	4.94e-08	-0.710692
ENSG00000110911	SLC11A2	solute carrier family 11 member 2	0.870194	0.767575	-0.0261819	0.200488	0.105385	-0.22544
ENSG00000116044	NFE2L2	nuclear factor, erythroid 2 like 2	0.77643	0.516386	0.088074	0.299802	0.178728	-0.146502
ENSG00000177000	MTHFR	methylenetetrahydrofolate reductase	0.713216	0.304747	-0.0752331	0.000386337	7.18e-05	-0.536369
ENSG00000197142	ACSL5	acyl-CoA synthetase long-chain family member 5	0.846851	0.710937	0.0315415	0.986102	0.986102	0.00274824
ENSG00000213366	GSTM2	glutathione S-transferase mu 2	0.8599	0.7356	0.0680864	0.156406	0.0751952	0.728449
ENSG00000047457	CP	ceruloplasmin	0.713216	0.316617	0.0562813	0.0177435	0.00625573	-0.500898
ENSG00000148965	SAA4	serum amyloid A4, constitutive	0.733063	0.359696	-0.0815345	0.833995	0.74006	0.119731
ENSG00000104635	SLC39A14	solute carrier family 39 member 14	0.870194	0.778877	0.0171368	0.719457	0.599547	0.0712849
ENSG00000057593	F7	coagulation factor VII	0.322124	0.0446364	0.201749	1.21e-06	1.39e-07	-0.690079
ENSG00000173432	SAA1	serum amyloid A1	0.947206	0.923819	0.0344038	6.59e-06	8.02e-07	1.91986
ENSG00000006625	GGCT	gamma-glutamylcyclotransferase	0.713216	0.286207	0.107479	4.84e-10	2.79e-11	1.04724
ENSG00000151726	ACSL1	acyl-CoA synthetase long-chain family member 1	0.491391	0.133464	-0.0897178	0.362758	0.227235	-0.147803
ENSG00000138449	SLC40A1	solute carrier family 40 member 1	0.77643	0.511538	-0.06015	0.0429181	0.0167821	-0.369871
ENSG00000123131	PRDX4	peroxiredoxin 4	0.395634	0.0887764	-0.164616	0.0028029	0.000704127	0.402003
ENSG00000182793	GSTA5	glutathione S-transferase alpha 5	0.548024	0.173086	-0.0915829	0.0941176	0.039819	1.94975
ENSG00000132693	CRP	C-reactive protein	0.75067	0.466431	0.256096	0.833995	0.743111	0.201282
ENSG00000100348	TXN2	thioredoxin 2	0.776516	0.570404	-0.0413216	0.480893	0.326761	0.119073
ENSG00000171105	INSR	insulin receptor	0.583008	0.201534	-0.0886256	0.72841	0.616347	-0.115482
ENSG00000117862	TXNDC12	thioredoxin domain containing 12	0.12558	0.00403706	0.270599	3.12e-05	4.68e-06	0.380934
ENSG00000112062	MAPK14	mitogen-activated protein kinase 14	0.77643	0.525978	0.0407346	0.493769	0.34817	0.0912199
ENSG00000138413	IDH1	isocitrate dehydrogenase (NADP+)) 1, cytosolic	0.733063	0.358628	-0.0503144	0.0904399	0.0376833	0.208251
ENSG00000156482	RPL30	ribosomal protein L30	0.12558	0.00400942	-0.135769	0.25251	0.139204	0.124737
ENSG00000197111	PCBP2	poly(rC) binding protein 2	0.398707	0.093524	-0.0922199	0.00523288	0.00157657	0.383038
ENSG00000111684	LPCAT3	lysophosphatidylcholine acyltransferase 3	0.322124	0.0414978	0.213856	0.178137	0.0879266	-0.235993
ENSG00000115107	STEAP3	STEAP3 metalloreductase	0.733063	0.411782	-0.0613662	0.918449	0.853831	0.0266006
ENSG00000001084	GCLC	glutamate-cysteine ligase catalytic subunit	0.945549	0.916365	0.00797551	0.967207	0.930007	0.0108323
ENSG00000243955	GSTA1	glutathione S-transferase alpha 1	0.713216	0.300732	-0.0812708	0.190604	0.0977455	0.195233
ENSG00000074771	NOX3	NADPH oxidase 3	0.78543	0.607039	0.0349552	NA	NA	NA
ENSG00000197769	MAP1LC3C	microtubule associated protein 1 light chain 3 gamma	0.366251	0.0627341	-0.152625	0.0153955	0.0053292	-2.42172
ENSG00000158125	XDH	xanthine dehydrogenase	0.733063	0.39602	0.0662436	0.603067	0.469091	-0.11728
ENSG00000185591	SP1	Sp1 transcription factor	0.583008	0.200282	0.0933344	3.26e-11	1.26e-12	-0.750477
ENSG00000057663	ATG5	autophagy related 5	0.765016	0.491122	0.0495195	3.95e-05	6.33e-06	0.43338
ENSG00000072274	TFRC	transferrin receptor	0.713216	0.311818	-0.183721	0.908527	0.826993	0.0774732
ENSG00000171867	PRNP	prion protein	0.924796	0.855273	0.0147123	0.972612	0.960143	-0.00675585
ENSG00000134339	SAA2	serum amyloid A2	0.941905	0.893388	-0.0490116	0.000224321	4.03e-05	1.66831
ENSG00000116984	MTR	5-methyltetrahydrofolate-homocysteine methyltransferase	0.776516	0.563249	-0.0397383	1.27e-16	8.15e-19	-1.2831
ENSG00000165637	VDAC2	voltage dependent anion channel 2	0.733063	0.396777	0.0710205	0.918449	0.845201	-0.0174065
ENSG00000166825	ANPEP	alanyl aminopeptidase, membrane	0.880718	0.793734	0.0171273	0.00196858	0.000466907	-0.419746
ENSG00000008394	MGST1	microsomal glutathione S-transferase 1	0.372105	0.072308	0.12046	0.376268	0.238785	0.1173
ENSG00000108439	PNPO	pyridoxamine 5'-phosphate oxidase	0.491076	0.127316	0.10445	3.12e-05	4.8e-06	-0.709829
ENSG00000163586	FABP1	fatty acid binding protein 1	0.299669	0.0304239	-0.174407	5.07e-11	2.27e-12	1.31264
ENSG00000023909	GCLM	glutamate-cysteine ligase modifier subunit	0.765016	0.489746	-0.0702153	0.58765	0.440737	0.140237
ENSG00000136244	IL6	interleukin 6	0.962646	0.950761	0.0100186	0.603067	0.460935	1.83102
ENSG00000178814	OPLAH	5-oxoprolinase (ATP-hydrolysing)	0.8599	0.748431	-0.0318625	0.0320141	0.0121079	-0.650728
ENSG00000104835	SARS2	seryl-tRNA synthetase 2, mitochondrial	0.8599	0.743964	-0.0223716	0.280814	0.158408	0.36402
ENSG00000167996	FTH1	ferritin heavy chain 1	0.78543	0.597048	-0.0272468	0.0110299	0.00367665	0.321645
ENSG00000255346	NOX5	NADPH oxidase 5	0.78543	0.615739	0.0411693	0.658735	0.52361	-0.777586
ENSG00000117450	PRDX1	peroxiredoxin 1	0.846851	0.704455	-0.0320185	0.0076465	0.00240179	0.301063
ENSG00000091513	TF	transferrin	0.802377	0.633977	-0.0179189	0.561649	0.406836	-0.121746
ENSG00000165672	PRDX3	peroxiredoxin 3	0.733063	0.389828	0.0511445	0.0278509	0.0101763	0.306549
ENSG00000130066	SAT1	spermidine/spermine N1-acetyltransferase 1	0.924796	0.856293	0.0136147	0.289914	0.1654	0.177991
ENSG00000109320	NFKB1	nuclear factor kappa B subunit 1	0.905125	0.826904	-0.0175949	5.7e-05	9.51e-06	-0.380704
ENSG00000148834	GSTO1	glutathione S-transferase omega 1	0.13346	0.00906212	-0.236313	1.16e-06	1.26e-07	0.610904
ENSG00000163631	ALB	albumin	0.846851	0.704018	0.0104409	0.600701	0.454376	0.110825
ENSG00000143416	SELENBP1	selenium binding protein 1	0.75067	0.459363	0.0705241	0.751694	0.640867	0.0464676
ENSG00000180098	TRNAU1AP	tRNA selenocysteine 1 associated protein 1	0.77643	0.509939	0.0400066	0.015264	0.00518586	0.342025
ENSG00000172845	SP3	Sp3 transcription factor	0.962646	0.947805	-0.00442219	0.0028029	0.000718692	-0.574552
ENSG00000121691	CAT	catalase	0.548024	0.175344	-0.0603834	0.153662	0.0719057	-0.213252
ENSG00000007952	NOX1	NADPH oxidase 1	0.63824	0.232445	0.0712314	NA	NA	NA
ENSG00000104368	PLAT	plasminogen activator, tissue type	0.713216	0.31963	0.112316	0.788817	0.677574	-0.113284
ENSG00000151012	SLC7A11	solute carrier family 7 member 11	0.765016	0.482633	-0.0637732	0.969124	0.949985	-0.0613013
ENSG00000084674	APOB	apolipoprotein B	0.733063	0.373346	0.0248602	0.00344741	0.000936174	-0.594825
ENSG00000140941	MAP1LC3B	microtubule associated protein 1 light chain 3 beta	0.75067	0.45392	-0.0587746	0.325082	0.20005	0.097426
ENSG00000135002	RFK	riboflavin kinase	0.395634	0.0870568	0.158531	0.587041	0.436517	0.135173
ENSG00000181019	NQO1	NAD(P)H quinone dehydrogenase 1	0.941905	0.878038	-0.0184188	0.173124	0.0843426	0.615897
ENSG00000123983	ACSL3	acyl-CoA synthetase long-chain family member 3	0.75067	0.46801	-0.0576994	0.918449	0.859574	-0.0177824
ENSG00000111537	IFNG	interferon gamma	0.776516	0.55189	-0.0484109	0.969124	0.938695	0.0593843
ENSG00000078668	VDAC3	voltage dependent anion channel 3	0.941905	0.895391	-0.00697333	0.00508541	0.00149954	0.317024
ENSG00000160688	FLAD1	flavin adenine dinucleotide synthetase 1	0.842434	0.681228	-0.02432	0.0380648	0.0146403	0.281031
ENSG00000118137	APOA1	apolipoprotein A1	0.615928	0.220518	-0.0670232	0.0982001	0.0422581	0.398251
ENSG00000168003	SLC3A2	solute carrier family 3 member 2	0.733063	0.396092	0.0738576	0.562896	0.411347	-0.115493
ENSG00000065621	GSTO2	glutathione S-transferase omega 2	0.366251	0.062766	-0.180674	0.0826681	0.0339151	0.534611
ENSG00000169564	PCBP1	poly(rC) binding protein 1	0.520998	0.156418	-0.0766452	0.156406	0.0746868	-0.172454
ENSG00000167815	PRDX2	peroxiredoxin 2	0.491391	0.131501	-0.0882083	0.193866	0.100661	-0.195023
ENSG00000126432	PRDX5	peroxiredoxin 5	0.395634	0.0886499	-0.158561	0.00141052	0.00031089	0.537034
ENSG00000166787	SAA3P	serum amyloid A3 pseudogene	0.776516	0.565194	0.0520059	#N/A	#N/A	#N/A
ENSG00000181867	FTMT	ferritin mitochondrial	0.833062	0.665463	0.0430317	NA	NA	NA
ENSG00000008441	NFIX	nuclear factor I X	0.870194	0.772609	0.0234877	4.54e-10	2.33e-11	-0.91173
ENSG00000087086	FTL	ferritin light chain	0.322124	0.0466619	0.10642	0.00453801	0.00127995	0.395648
ENSG00000073060	SCARB1	scavenger receptor class B member 1	0.366251	0.0678242	0.105319	0.719457	0.598649	0.0729282
ENSG00000100292	HMOX1	heme oxygenase 1	0.12558	0.0069029	0.400809	4.96e-15	6.36e-17	-1.77601
ENSG00000281938	ACSL6	acyl-CoA synthetase long-chain family member 6	0.77643	0.527205	-0.0438891	0.001971	0.000480116	0.896806
ENSG00000104687	GSR	glutathione-disulfide reductase	0.672236	0.253126	0.0617286	0.468022	0.31179	-0.132697
ENSG00000141510	TP53	tumor protein p53	0.372105	0.0735023	0.14377	1.44e-09	1.11e-10	-0.693653
ENSG00000100983	GSS	glutathione synthetase	0.735808	0.417866	0.0483899	0.144859	0.0668581	0.202904
ENSG00000197548	ATG7	autophagy related 7	0.8599	0.742979	0.0189768	0.969124	0.950487	-0.0064026
ENSG00000232810	TNF	tumor necrosis factor	0.780997	0.587148	0.058787	0.645701	0.50911	0.256102
ENSG00000132394	EEFSEC	eukaryotic elongation factor, selenocysteine-tRNA specific	0.713216	0.28764	0.0735769	0.294892	0.17202	-0.202883
ENSG00000173039	RELA	RELA proto-oncogene, NF-kB subunit	0.480791	0.121682	0.121605	6.91e-14	1.33e-15	-0.79375
ENSG00000165168	CYBB	cytochrome b-245 beta chain	0.322124	0.0425772	0.405562	1.79e-13	4.59e-15	-2.1819
ENSG00000109610	SOD3	superoxide dismutase 3, extracellular	0.941905	0.890522	-0.0151083	0.918449	0.857639	-0.0608027
ENSG00000266412	NCOA4	nuclear receptor coactivator 4	0.299669	0.0309783	0.103544	0.485117	0.33896	-0.124349
ENSG00000086991	NOX4	NADPH oxidase 4	0.733063	0.373566	0.081789	0.700295	0.570112	-0.427903
ENSG00000179593	ALOX15B	arachidonate 15-lipoxygenase, type B	0.657394	0.243479	-0.0764104	0.290145	0.167391	0.989479
ENSG00000095303	PTGS1	prostaglandin-endoperoxide synthase 1	0.733063	0.406143	0.0783594	0.000716088	0.00014689	-0.587934
ENSG00000090339	ICAM1	intercellular adhesion molecule 1	0.713216	0.291756	0.124879	2.36e-05	3.33e-06	-0.858787
ENSG00000136810	TXN	thioredoxin	0.267525	0.0214681	-0.334073	0.00084817	0.000179421	0.399521
ENSG00000144035	NAT8	N-acetyltransferase 8 (putative)	0.733063	0.386535	0.161405	0.030319	0.0112725	0.585905
ENSG00000206172	HBA1	hemoglobin subunit alpha 1	0.75067	0.450778	0.12308	0.24939	0.135885	-0.519087
ENSG00000005381	MPO	myeloperoxidase	0.413322	0.0995034	0.190386	0.0083999	0.00269227	-1.64867
ENSG00000160211	G6PD	glucose-6-phosphate dehydrogenase	0.195325	0.0144685	0.163688	0.0982001	0.0431562	-0.451517
ENSG00000099998	GGT5	gamma-glutamyltransferase 5	0.520998	0.155082	0.142023	0.700295	0.567938	0.116039
ENSG00000244734	HBB	hemoglobin subunit beta	0.75067	0.441707	0.214241	0.00141052	0.000316463	1.71754
ENSG00000077150	NFKB2	nuclear factor kappa B subunit 2	0.75067	0.432273	0.0842696	0.474852	0.319612	-0.179657
ENSG00000012779	ALOX5	arachidonate 5-lipoxygenase	0.12558	0.00608568	0.283334	6.04e-08	5.81e-09	-1.46583
ENSG00000125538	IL1B	interleukin 1 beta	0.366251	0.0673592	0.378334	0.0982001	0.0434347	-1.04666
ENSG00000101460	MAP1LC3A	microtubule associated protein 1 light chain 3 alpha	0.75067	0.467684	0.0813315	0.00344741	0.000950247	0.820942
ENSG00000073756	PTGS2	prostaglandin-endoperoxide synthase 2	0.520998	0.157586	0.332255	0.700295	0.566696	0.323504
ENSG00000171223	JUNB	JunB proto-oncogene, AP-1 transcription factor subunit	0.776516	0.569793	0.117659	0.468022	0.310864	-0.349884
ENSG00000177606	JUN	Jun proto-oncogene, AP-1 transcription factor subunit	0.78543	0.605597	0.133149	0.101312	0.0454603	0.514284
ENSG00000132965	ALOX5AP	arachidonate 5-lipoxygenase activating protein	0.130337	0.00804549	0.415449	0.485117	0.33635	-0.261014
ENSG00000100031	GGT1	gamma-glutamyltransferase 1	0.518361	0.147189	0.20962	0.0197661	0.00709553	-0.56821
ENSG00000108691	CCL2	C-C motif chemokine ligand 2	0.776516	0.559191	0.18468	0.10435	0.0474926	0.419306
ENSG00000170345	FOS	Fos proto-oncogene, AP-1 transcription factor subunit	0.891206	0.808687	0.101104	0.502899	0.361056	-0.318389
ENSG00000106366	SERPINE1	serpin family E member 1	0.299669	0.0314468	0.598353	0.833995	0.740752	-0.112152
ENSG00000068366	ACSL4	acyl-CoA synthetase long-chain family member 4	0.421634	0.104107	0.506757	0.455952	0.2952	0.630721

## Sheet: Suppl Table 4. HOC vs NASH
Supplementary Table 4. Differential gene expression of genes included in the analysis in NASH compared to Healthy Obese Controls (HOC) (Suppli et al. [28], Horvath et al. [30]). Significant adjusted P-values in bold.
ENSG_ID	Gene_name	Full gene name	Horvath_adj.p_value	Horvath_p_value	Horvath_logFC	Suppli_adj.p_value	Suppli_p_value	Suppli_logFC
Selenoproteins
ENSG00000197763	TXNRD3	thioredoxin reductase 3	0.034564	0.00298701	-0.211613	2.71e-06	3.48e-07	-0.486573
ENSG00000113811	SELENOK	selenoprotein K	0.791804	0.664725	-0.0327265	1.03e-08	6.63e-10	0.573071
ENSG00000184470	TXNRD2	thioredoxin reductase 2	0.168819	0.0366719	-0.170985	0.363743	0.247159	-0.195708
ENSG00000179918	SEPHS2	selenophosphate synthetase 2	0.587384	0.422027	-0.0713919	3.9e-10	2.25e-11	0.400375
ENSG00000186838	SELENOV	selenoprotein V	0.121588	0.0193957	-0.210591	NA	NA	NA
ENSG00000211450	SELENOH	selenoprotein H	0.0696891	0.00774324	-0.177469	0.930068	0.882372	0.0601381
ENSG00000250722	SELENOP	selenoprotein P	0.335449	0.149088	-0.089183	0.843177	0.740986	0.0501546
ENSG00000183291	SELENOF	selenoprotein F	0.395068	0.185273	0.0839561	0.073361	0.0385615	0.140745
ENSG00000138018	SELENOI	selenoprotein I	0.913052	0.805966	0.0188206	0.270649	0.171758	-0.229018
ENSG00000198736	MSRB1	methionine sulfoxide reductase B1	0.686204	0.529479	-0.0437004	0.714256	0.570366	0.0659178
ENSG00000198843	SELENOT	selenoprotein T	0.425952	0.222131	0.113256	0.162559	0.0958681	0.123899
ENSG00000131871	SELENOS	selenoprotein S	0.506285	0.335825	-0.0809786	2.36e-14	7.56e-16	0.744164
ENSG00000197406	DIO3	deiodinase, iodothyronine type III	0.492164	0.298152	-0.0892548	0.291486	0.190587	-1.0434
ENSG00000211448	DIO2	deiodinase, iodothyronine type II	0.607786	0.446685	0.0529034	0.265831	0.165292	1.72561
ENSG00000211452	DIO1	deiodinase, iodothyronine type I	0.809163	0.689287	0.0364481	0.0134692	0.00500777	0.438896
ENSG00000198704	GPX6	glutathione peroxidase 6	0.579589	0.411436	-0.0568006	NA	NA	NA
ENSG00000211445	GPX3	glutathione peroxidase 3	0.405164	0.202582	0.146331	0.000106223	2.18e-05	0.576545
ENSG00000178980	SELENOW	selenoprotein W	0.449974	0.24443	-0.0817261	4.33e-06	7.22e-07	0.920324
ENSG00000167468	GPX4	glutathione peroxidase 4	0.483827	0.273918	0.0699529	0.865059	0.77079	0.0394296
ENSG00000073169	SELENOO	selenoprotein O	0.486756	0.284462	0.0742113	0.000431929	0.000107982	-0.772295
ENSG00000233276	GPX1	glutathione peroxidase 1	0.23608	0.0641205	0.101004	0.151764	0.0881676	-0.37861
ENSG00000198431	TXNRD1	thioredoxin reductase 1	0.0696891	0.00769457	0.217427	0.0768122	0.0417391	0.240458
ENSG00000198832	SELENOM	selenoprotein M	0.377456	0.172064	0.118959	0.0497007	0.023576	0.611812
ENSG00000162430	SELENON	selenoprotein N	0.0107245	0.000331003	0.314254	0.00139827	0.000403346	-0.502925
ENSG00000176153	GPX2	glutathione peroxidase 2	0.314445	0.126166	0.351445	0.00636818	0.00216355	1.18956
Other genes in included pathways
ENSG00000140465	CYP1A1	cytochrome P450 family 1 subfamily A member 1	0.033031	0.00265064	-0.955739	0.514648	0.385986	-0.421528
ENSG00000134184	GSTM1	glutathione S-transferase mu 1	0.948399	0.900629	-0.0867786	0.984682	0.972058	0.0490367
ENSG00000277656	GSTT1	glutathione S-transferase theta 1	0.853292	0.737412	0.19531	#N/A	#N/A	#N/A
ENSG00000099984	GSTT2	glutathione S-transferase theta 2 (gene/pseudogene)	0.0254938	0.00178402	-0.934285	#N/A	#N/A	#N/A
ENSG00000189221	MAOA	monoamine oxidase A	0.00200265	1.23621e-05	-0.288503	4.23e-06	6.78e-07	-0.580028
ENSG00000116761	CTH	cystathionine gamma-lyase	0.325569	0.140478	-0.187792	0.962934	0.938244	0.0131286
ENSG00000160200	CBS	cystathionine-beta-synthase	0.00398215	4.91624e-05	-0.325205	0.165171	0.0984671	-1.04709
ENSG00000117009	KMO	kynurenine 3-monooxygenase	0.287598	0.101192	-0.182153	0.937467	0.895401	-0.0241689
ENSG00000141504	SAT2	spermidine/spermine N1-acetyltransferase family member 2	0.0254938	0.00152777	-0.336162	0.000226939	5.09e-05	0.562842
ENSG00000109618	SEPSECS	Sep (O-phosphoserine) tRNA:Sec (selenocysteine) tRNA synthase	0.0584897	0.00577676	-0.284634	0.714256	0.572321	0.107492
ENSG00000132330	SCLY	selenocysteine lyase	0.136728	0.0236319	-0.214803	0.0346995	0.0142357	0.91741
ENSG00000115919	KYNU	kynureninase	0.398976	0.189752	-0.123685	0.273701	0.176328	-0.153579
ENSG00000142168	SOD1	superoxide dismutase 1, soluble	0.00477852	8.84911e-05	-0.211132	0.913649	0.85188	-0.0157134
ENSG00000180210	F2	coagulation factor II, thrombin	0.168819	0.0375154	-0.151241	0.843177	0.731675	-0.042008
ENSG00000138821	SLC39A8	solute carrier family 39 member 8	0.300008	0.11667	-0.114522	0.358364	0.241207	0.123144
ENSG00000165029	ABCA1	ATP binding cassette subfamily A member 1	0.238019	0.0675718	-0.154928	9.35e-07	9.59e-08	-1.33194
ENSG00000273259	SERPINA3	serpin family A member 3	0.0870777	0.0118254	-0.152891	0.860962	0.76971	0.0833164
ENSG00000187193	MT1X	metallothionein 1X	0.270603	0.0868604	-0.142482	6.6e-21	4.23e-23	-2.57486
ENSG00000122194	PLG	plasminogen	0.0254938	0.00176148	-0.199773	3.86e-08	2.97e-09	-0.987589
ENSG00000110911	SLC11A2	solute carrier family 11 member 2	0.198303	0.0477395	-0.185898	0.0732656	0.0371025	-0.325243
ENSG00000116044	NFE2L2	nuclear factor, erythroid 2 like 2	0.948399	0.890537	0.0168561	0.0169581	0.00641364	-0.30754
ENSG00000177000	MTHFR	methylenetetrahydrofolate reductase	0.23608	0.0628752	-0.171408	0.0518284	0.0249175	-0.397739
ENSG00000197142	ACSL5	acyl-CoA synthetase long-chain family member 5	0.446282	0.23967	-0.0999311	0.00446559	0.00140265	-0.483133
ENSG00000213366	GSTM2	glutathione S-transferase mu 2	0.400457	0.195285	-0.270716	0.0106775	0.00383123	1.50796
ENSG00000047457	CP	ceruloplasmin	0.50784	0.34483	-0.0469078	0.000186209	3.94e-05	-0.772606
ENSG00000148965	SAA4	serum amyloid A4, constitutive	0.288362	0.108463	-0.141634	0.0264359	0.0105066	-0.760641
ENSG00000104635	SLC39A14	solute carrier family 39 member 14	0.425952	0.220398	-0.0807302	0.30591	0.20394	-0.152038
ENSG00000057593	F7	coagulation factor VII	0.937458	0.84487	0.0180918	3.86e-08	2.91e-09	-0.797991
ENSG00000173432	SAA1	serum amyloid A1	0.607786	0.450212	0.199487	2.92e-06	4.3e-07	1.77333
ENSG00000006625	GGCT	gamma-glutamylcyclotransferase	0.285065	0.0985411	0.185428	1.14e-11	5.84e-13	1.14616
ENSG00000151726	ACSL1	acyl-CoA synthetase long-chain family member 1	0.506005	0.327966	-0.0495699	0.121925	0.06956	-0.258462
ENSG00000138449	SLC40A1	solute carrier family 40 member 1	0.486756	0.287351	-0.111251	0.00336608	0.00103572	-0.434789
ENSG00000123131	PRDX4	peroxiredoxin 4	0.318621	0.129809	-0.126008	0.00285512	0.000841895	0.405773
ENSG00000182793	GSTA5	glutathione S-transferase alpha 5	0.325569	0.138199	-0.0955206	0.0226704	0.00886471	2.29384
ENSG00000132693	CRP	C-reactive protein	0.377456	0.172418	0.363006	0.258878	0.159309	-0.729932
ENSG00000100348	TXN2	thioredoxin 2	0.426241	0.226276	-0.0822997	0.833602	0.710699	0.0433243
ENSG00000171105	INSR	insulin receptor	0.143117	0.0256197	-0.130664	0.839757	0.72133	-0.0768424
ENSG00000117862	TXNDC12	thioredoxin domain containing 12	0.699832	0.544314	0.0606545	0.0422028	0.0197487	0.258158
ENSG00000112062	MAPK14	mitogen-activated protein kinase 14	0.809688	0.694732	0.0264998	0.889061	0.809273	-0.0202693
ENSG00000138413	IDH1	isocitrate dehydrogenase (NADP+)) 1, cytosolic	0.251732	0.0761411	-0.107468	0.912765	0.842552	0.020826
ENSG00000156482	RPL30	ribosomal protein L30	0.150014	0.0279688	-0.0846996	0.539373	0.414902	0.0856731
ENSG00000197111	PCBP2	poly(rC) binding protein 2	0.50391	0.315247	-0.0494373	0.0768122	0.0418528	0.227341
ENSG00000111684	LPCAT3	lysophosphatidylcholine acyltransferase 3	0.887645	0.77258	0.0307512	0.0707023	0.0353512	-0.375243
ENSG00000115107	STEAP3	STEAP3 metalloreductase	0.492164	0.299654	-0.0819593	0.384097	0.265913	-0.156341
ENSG00000001084	GCLC	glutamate-cysteine ligase catalytic subunit	0.998779	0.996658	-0.000314255	0.904415	0.829047	-0.0275965
ENSG00000243955	GSTA1	glutathione S-transferase alpha 1	0.948399	0.884719	-0.0110713	0.394602	0.280774	0.173365
ENSG00000074771	NOX3	NADPH oxidase 3	0.948399	0.928094	-0.00562992	NA	NA	NA
ENSG00000197769	MAP1LC3C	microtubule associated protein 1 light chain 3 gamma	0.163568	0.034329	-0.181236	0.0397898	0.0181094	-2.00223
ENSG00000158125	XDH	xanthine dehydrogenase	0.948399	0.924241	0.00755289	0.073361	0.0383858	-0.330362
ENSG00000185591	SP1	Sp1 transcription factor	0.486756	0.288448	0.0756084	2.25e-13	8.66e-15	-0.781141
ENSG00000057663	ATG5	autophagy related 5	0.983334	0.971194	-0.00286096	1.37e-06	1.58e-07	0.529665
ENSG00000072274	TFRC	transferrin receptor	0.942865	0.860547	0.032361	0.0396306	0.017783	0.742547
ENSG00000171867	PRNP	prion protein	0.768724	0.631113	0.0407001	0.808275	0.678744	0.0510793
ENSG00000134339	SAA2	serum amyloid A2	0.587384	0.424748	0.222173	2.8e-06	3.77e-07	2.06235
ENSG00000116984	MTR	5-methyltetrahydrofolate-homocysteine methyltransferase	0.70122	0.562438	-0.0321029	1.62e-06	1.97e-07	-1.03549
ENSG00000165637	VDAC2	voltage dependent anion channel 2	0.765717	0.623917	0.0404031	0.945384	0.915083	-0.0101763
ENSG00000166825	ANPEP	alanyl aminopeptidase, membrane	0.425952	0.219076	-0.0755749	3.85e-07	3.2e-08	-0.677395
ENSG00000008394	MGST1	microsomal glutathione S-transferase 1	0.483827	0.274766	0.0722566	0.992725	0.992725	0.000893743
ENSG00000108439	PNPO	pyridoxamine 5'-phosphate oxidase	0.425952	0.223493	0.0881472	2.29e-05	4.11e-06	-0.595528
ENSG00000163586	FABP1	fatty acid binding protein 1	0.50391	0.322921	-0.0775571	4.55e-07	4.38e-08	1.12551
ENSG00000023909	GCLM	glutamate-cysteine ligase modifier subunit	0.998779	0.998779	0.000180793	0.731407	0.59544	0.104227
ENSG00000136244	IL6	interleukin 6	0.661186	0.49793	0.145297	0.833602	0.706537	1.13615
ENSG00000178814	OPLAH	5-oxoprolinase (ATP-hydrolysing)	0.288362	0.108581	-0.165648	0.00733999	0.00254077	-0.67422
ENSG00000104835	SARS2	seryl-tRNA synthetase 2, mitochondrial	0.506285	0.336671	-0.0611072	0.0404779	0.0186821	0.473371
ENSG00000167996	FTH1	ferritin heavy chain 1	0.673213	0.515299	0.0264879	0.0396306	0.0172869	0.285872
ENSG00000255346	NOX5	NADPH oxidase 5	0.270603	0.0852608	-0.129658	0.843177	0.739718	-0.372895
ENSG00000117450	PRDX1	peroxiredoxin 1	0.791804	0.661713	0.034755	0.00585645	0.00195215	0.277521
ENSG00000091513	TF	transferrin	0.656324	0.490217	-0.0245109	0.302473	0.19971	-0.180622
ENSG00000165672	PRDX3	peroxiredoxin 3	0.948399	0.876808	-0.0081083	0.0396306	0.0171784	0.246048
ENSG00000130066	SAT1	spermidine/spermine N1-acetyltransferase 1	0.50391	0.32079	-0.078305	0.225738	0.137469	0.233901
ENSG00000109320	NFKB1	nuclear factor kappa B subunit 1	0.174903	0.0399469	0.174834	0.0326969	0.0132045	-0.20399
ENSG00000148834	GSTO1	glutathione S-transferase omega 1	0.554067	0.386479	-0.0636031	3.99e-07	3.58e-08	0.53269
ENSG00000163631	ALB	albumin	0.587384	0.427848	-0.0191337	0.843177	0.745887	-0.0509907
ENSG00000143416	SELENBP1	selenium binding protein 1	0.506285	0.337523	-0.0896188	0.482726	0.355856	0.0838513
ENSG00000180098	TRNAU1AP	tRNA selenocysteine 1 associated protein 1	0.554067	0.386409	-0.0523603	0.0396306	0.0171923	0.361017
ENSG00000172845	SP3	Sp3 transcription factor	0.948399	0.930836	0.00502568	0.073361	0.0381258	-0.379965
ENSG00000121691	CAT	catalase	0.948399	0.907894	-0.00455893	0.00139827	0.000400833	-0.430819
ENSG00000007952	NOX1	NADPH oxidase 1	0.948399	0.908019	-0.00535022	NA	NA	NA
ENSG00000104368	PLAT	plasminogen activator, tissue type	0.333304	0.146078	0.183462	0.495985	0.36881	0.181454
ENSG00000151012	SLC7A11	solute carrier family 7 member 11	0.70122	0.555527	-0.0477523	0.394602	0.277534	1.1047
ENSG00000084674	APOB	apolipoprotein B	0.790183	0.653608	0.0113576	0.000196549	4.28e-05	-0.806667
ENSG00000140941	MAP1LC3B	microtubule associated protein 1 light chain 3 beta	0.891289	0.781253	0.0235642	0.0879215	0.0484695	0.160011
ENSG00000135002	RFK	riboflavin kinase	0.275016	0.092167	0.174899	0.415659	0.303751	0.189743
ENSG00000181019	NQO1	NAD(P)H quinone dehydrogenase 1	0.948399	0.881724	0.0186976	3.72e-05	7.27e-06	1.16884
ENSG00000123983	ACSL3	acyl-CoA synthetase long-chain family member 3	0.70122	0.562708	0.046802	0.737425	0.605067	0.0527551
ENSG00000111537	IFNG	interferon gamma	0.764553	0.61825	-0.0396791	0.770532	0.637171	-0.359821
ENSG00000078668	VDAC3	voltage dependent anion channel 3	0.492164	0.300767	-0.0555269	0.0012453	0.000335272	0.344733
ENSG00000160688	FLAD1	flavin adenine dinucleotide synthetase 1	0.948399	0.922821	0.00516646	0.00110419	0.000290204	0.339072
ENSG00000118137	APOA1	apolipoprotein A1	0.314445	0.124433	-0.073219	0.00511593	0.00163972	0.5832
ENSG00000168003	SLC3A2	solute carrier family 3 member 2	0.915425	0.813711	0.0203008	0.0396306	0.0176012	-0.286889
ENSG00000065621	GSTO2	glutathione S-transferase omega 2	0.70122	0.550908	0.0550905	0.0534072	0.0260189	0.684994
ENSG00000169564	PCBP1	poly(rC) binding protein 1	0.208986	0.0516015	0.0934281	0.267476	0.16803	-0.106173
ENSG00000167815	PRDX2	peroxiredoxin 2	0.566703	0.398791	-0.0578721	0.22098	0.133154	-0.202191
ENSG00000126432	PRDX5	peroxiredoxin 5	0.288362	0.104666	-0.128013	0.000257963	6.12e-05	0.561588
ENSG00000166787	SAA3P	serum amyloid A3 pseudogene	0.809163	0.68648	0.0353406	#N/A	#N/A	#N/A
ENSG00000181867	FTMT	ferritin mitochondrial	0.937458	0.839133	-0.0144916	NA	NA	NA
ENSG00000008441	NFIX	nuclear factor I X	0.275016	0.0904322	0.118389	4.22e-20	5.41e-22	-1.08424
ENSG00000087086	FTL	ferritin light chain	0.238019	0.0675856	0.0928002	0.000274524	6.69e-05	0.432417
ENSG00000073060	SCARB1	scavenger receptor class B member 1	0.554067	0.385988	0.0537601	0.645633	0.500779	-0.0629297
ENSG00000100292	HMOX1	heme oxygenase 1	0.300008	0.115744	0.24527	4.7e-17	9.04e-19	-1.69002
ENSG00000281938	ACSL6	acyl-CoA synthetase long-chain family member 6	0.50391	0.323498	0.0689749	3.72e-05	7.4e-06	1.18046
ENSG00000104687	GSR	glutathione-disulfide reductase	0.0348358	0.00322554	0.151175	0.880771	0.796081	-0.0290396
ENSG00000141510	TP53	tumor protein p53	0.150014	0.0305584	0.179251	9.83e-07	1.07e-07	-0.487059
ENSG00000100983	GSS	glutathione synthetase	0.325569	0.137818	0.0897995	0.000494467	0.000126786	0.409296
ENSG00000197548	ATG7	autophagy related 7	0.270603	0.084159	0.110885	0.913649	0.856793	-0.0183088
ENSG00000232810	TNF	tumor necrosis factor	0.121588	0.0202446	0.18677	0.719419	0.58107	0.247679
ENSG00000132394	EEFSEC	eukaryotic elongation factor, selenocysteine-tRNA specific	0.486756	0.284195	0.0674726	0.0768122	0.0417529	-0.217757
ENSG00000173039	RELA	RELA proto-oncogene, NF-kB subunit	0.398976	0.1921	0.0948735	2.09e-16	5.37e-18	-0.814863
ENSG00000165168	CYBB	cytochrome b-245 beta chain	0.483827	0.271445	0.256392	2e-12	8.99e-14	-1.87555
ENSG00000109610	SOD3	superoxide dismutase 3, extracellular	0.483827	0.270278	0.123706	0.110518	0.0618176	0.752517
ENSG00000266412	NCOA4	nuclear receptor coactivator 4	0.275016	0.0933696	0.0924722	0.539373	0.412105	-0.102893
ENSG00000086991	NOX4	NADPH oxidase 4	0.325569	0.140678	0.149903	0.3733	0.256045	0.706086
ENSG00000179593	ALOX15B	arachidonate 15-lipoxygenase, type B	0.401572	0.198307	0.101998	0.00537429	0.00175698	1.97395
ENSG00000095303	PTGS1	prostaglandin-endoperoxide synthase 1	0.121588	0.0202647	0.213317	0.394602	0.28061	-0.210053
ENSG00000090339	ICAM1	intercellular adhesion molecule 1	0.179192	0.0420326	0.298547	3.68e-05	6.85e-06	-0.71338
ENSG00000136810	TXN	thioredoxin	0.942865	0.861383	-0.0209561	2.92e-06	4.15e-07	0.599625
ENSG00000144035	NAT8	N-acetyltransferase 8 (putative)	0.50784	0.342593	0.152449	0.00317827	0.000957555	0.871997
ENSG00000206172	HBA1	hemoglobin subunit alpha 1	0.101831	0.0144574	0.39318	0.986338	0.980015	-0.0103647
ENSG00000005381	MPO	myeloperoxidase	0.240037	0.0696403	0.217166	0.000234906	5.42e-05	-2.65526
ENSG00000160211	G6PD	glucose-6-phosphate dehydrogenase	0.0831037	0.00974673	0.177056	0.062625	0.0309111	-0.436891
ENSG00000099998	GGT5	gamma-glutamyltransferase 5	0.0189232	0.000700861	0.377712	0.0106775	0.00383294	0.588537
ENSG00000244734	HBB	hemoglobin subunit beta	0.221788	0.0575007	0.503817	0.0381376	0.0158907	1.11615
ENSG00000077150	NFKB2	nuclear factor kappa B subunit 2	0.150014	0.0298046	0.30199	0.40125	0.290649	0.177185
ENSG00000012779	ALOX5	arachidonate 5-lipoxygenase	0.0107245	0.000286384	0.42148	0.00132647	0.000365631	-0.935445
ENSG00000125538	IL1B	interleukin 1 beta	0.150014	0.0297297	0.414732	0.110518	0.0623434	-0.685016
ENSG00000101460	MAP1LC3A	microtubule associated protein 1 light chain 3 alpha	0.288362	0.105768	0.189849	3.7e-06	5.69e-07	1.00033
ENSG00000073756	PTGS2	prostaglandin-endoperoxide synthase 2	0.118811	0.0176016	0.744976	0.680593	0.536621	0.348604
ENSG00000171223	JUNB	JunB proto-oncogene, AP-1 transcription factor subunit	0.395068	0.185341	0.338008	0.86782	0.778813	0.0907323
ENSG00000177606	JUN	Jun proto-oncogene, AP-1 transcription factor subunit	0.221788	0.0573158	0.541889	2.05e-05	3.55e-06	1.18466
ENSG00000132965	ALOX5AP	arachidonate 5-lipoxygenase activating protein	0.0207575	0.00102506	0.553497	0.680593	0.534409	0.154567
ENSG00000100031	GGT1	gamma-glutamyltransferase 1	0.0864629	0.0106744	0.375712	0.151764	0.0885288	-0.271483
ENSG00000108691	CCL2	C-C motif chemokine ligand 2	0.250452	0.0742081	0.608579	0.0121654	0.00444505	0.6569
ENSG00000170345	FOS	Fos proto-oncogene, AP-1 transcription factor subunit	0.665575	0.505344	0.304567	0.40125	0.290482	0.326758
ENSG00000106366	SERPINE1	serpin family E member 1	0.0254938	0.00188843	0.982732	0.273701	0.177204	0.447395
ENSG00000068366	ACSL4	acyl-CoA synthetase long-chain family member 4	0.0206965	0.000894295	0.955371	0.0219315	0.00843519	1.49083
