# Supplementary material for: Selenotranscriptome Network in Non-alcoholic Fatty Liver Disease
Source: Front Nutr. 2021 Nov 17;8:744825. doi: 10.3389/fnut.2021.744825 (PMC8635790; doi:10.3389/fnut.2021.744825)
Supplement: Supplementary file 2 [file Table_2.xlsx]

## Sheet: Sheet1
Supplementary Table 5. Gene ontology results from original studies*.
Frades et al.	Ahrens et al.
KEGG terms	GO term
3-choloroacrylic acid degradation	GO:0009987 cellular process
Alkaloid biosynthesis I	GO:0048856 anatomical structure development
Androgen and estrogen metabolism	GO:0051716 cellular response to stimulus
Arachidonic acid metabolism	GO:0023052 signalling,
Ascorbate and aldarate metabolism	GO:0032502 developmental process
Bile acid biosynthesis	GO:0007154 cell communication
Biosynthesis of unstaurated fatty acids	GO:0048731 system development
Caffeine metabolism	GO:0007275 multicellular organismal development
Cell cycle	GO:0007165 signal transduction
Complement and coagulation cascades	GO:0048583 regulation of response to stimulus
Cytokine-cytokine receptor interaction	GO:0032501 multicellular organismal process
Drug metabolism - cytochrome P450	GO:0009653 anatomical structure morphogenesis
Drug metabolism - other enzymes	GO:0048518 positive regulation of biological process
Fatty acid metabolism	GO:0023051 regulation of signalling
Glycine, serine and theronine metabolism	GO:0065007 biological regulation
Glycolysis/Gluconeogenesis	GO:0009966 regulation of signal transduction
Glyoxylate and dicarboxylate metabolism
Limonene and pinene-degradation
Metabolism of xenobiotics by cytochrome P450
Nitrogen metabolism
Novobiocin biosynthesis
p53 signalling pathway
Pentose and glucuronate interconversions
Phenylanaline, tyrosine and tryptophan biosynthesis
Porphyrin and chlorophyll metabolism
PPAR signalling pathway
Retinol metabolism
Terpenoid biosynthesis
Tryosine metabolism
Vitamin B6 metabolism
Cysteine metabolism
Glutathione metabolism
Monoterpenoid biosynthesis
Toll-like receptor signalling
MAPK signalling pathway
Peptidoglycan biosynthesis
*Highlighted terms were also enriched in between the 164 genes included in this analysis.
